# Supplementary material for: Synthesis and mutagenic risk of avanafil's potential genotoxic impurities
Source: Royal Society of Chemistry journal article supplement (doi:10.1039/d4ra02345e), 2024-01-01
Supplement: d4ra02345e1.pdf [file d4ra02345e1.pdf]

# Synthesis and mutagenic risk of Avanafil's potential genotoxic impurities

Yunkai Sun <sup>a,b\*</sup>, Xiaoxia Wu <sup>b,c</sup>, Pei Zuo <sup>c</sup>, Zhao Liu <sup>c\*</sup>, Xuepei Miao, <sup>a</sup> Jian Liu<sup>a</sup>, Hairuo Wen<sup>d\*</sup>

<sup>a</sup> School of Chemical Engineering and Materials, Changzhou Institute of Technology, Changzhou 213022, China;

<sup>b</sup> School of Chemistry and Chemical Engineering, University of South China, Hengyang 421001, China;

<sup>c</sup> Harvest Pharmaceutical Co., Ltd, Changsha 410000, China;

<sup>d</sup> National Center for Safety Evaluation of Drugs, National Institutes for Food and Drug Control, Key Laboratory of Beijing for Nonclinical Safety Evaluation Research of Drugs, Beijing, 100176, P.R. China

## I. High resolution mass spectra

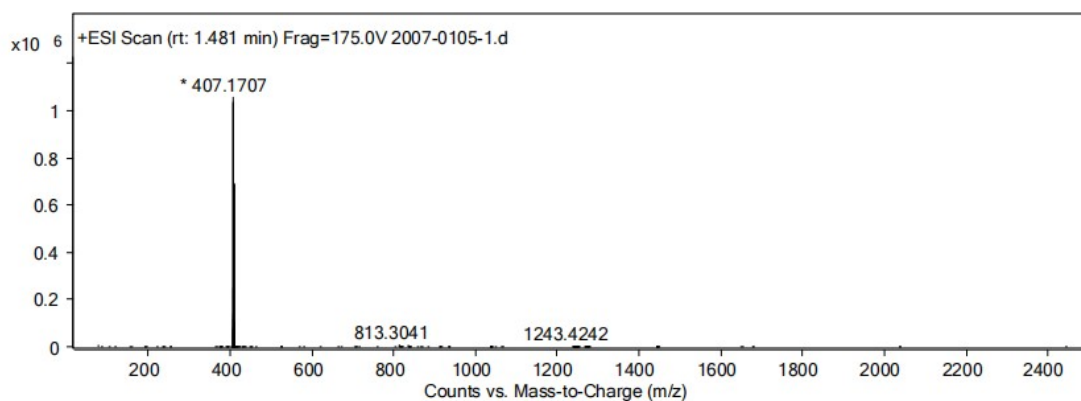

Figure S1 High resolution mass spectrum of Imp-E

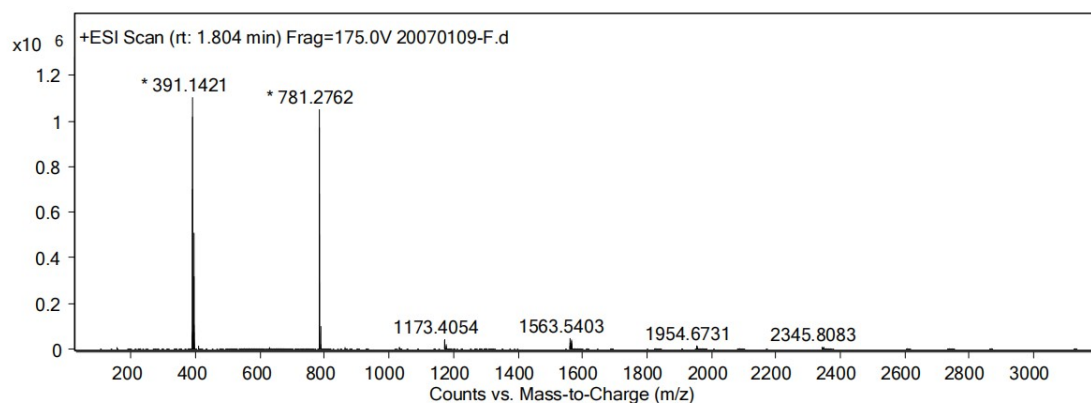

Figure S2 High resolution mass spectrum of Imp-F

## II. NMR spectra

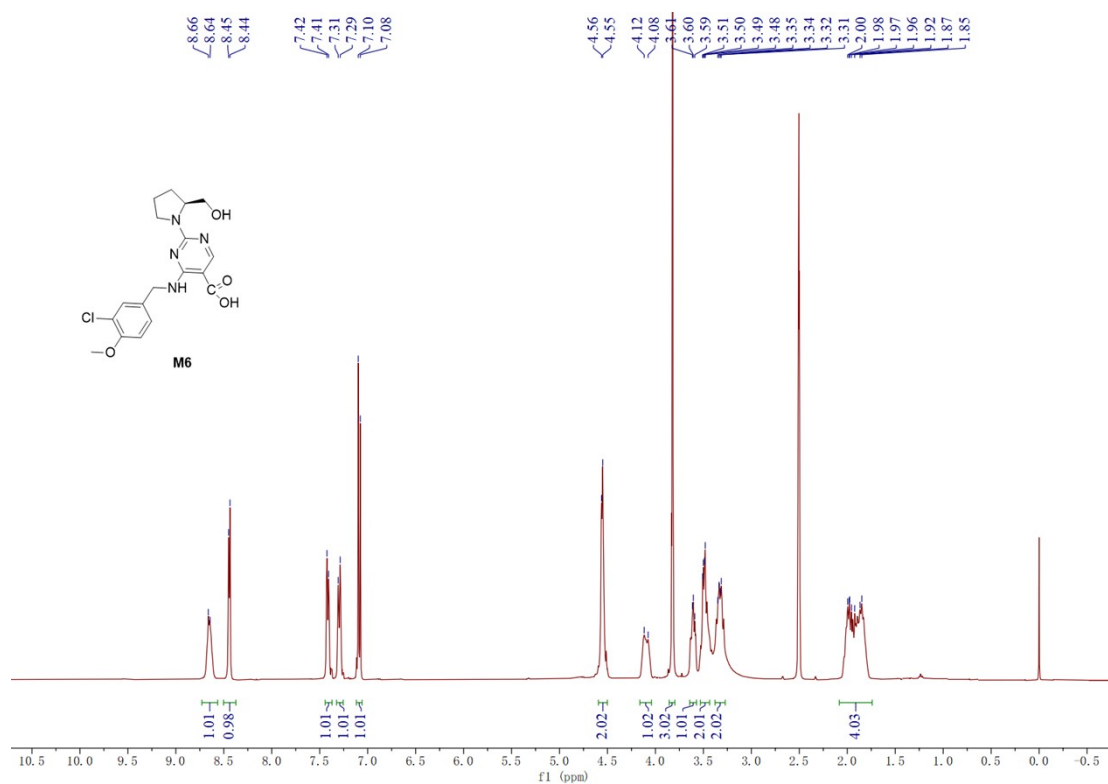

Figure S3 <sup>1</sup>H NMR spectra of M6 (DMSO-d<sub>6</sub>)

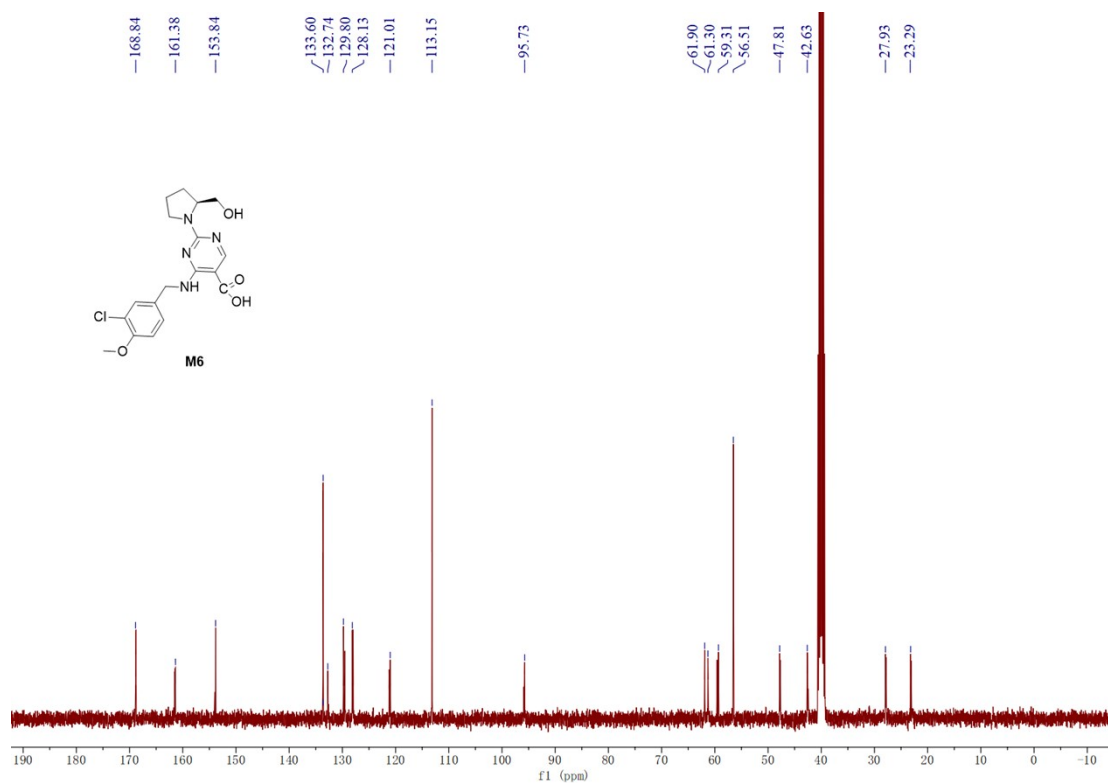

Figure S4 <sup>13</sup>C NMR spectra of M6 (DMSO-d<sub>6</sub>)

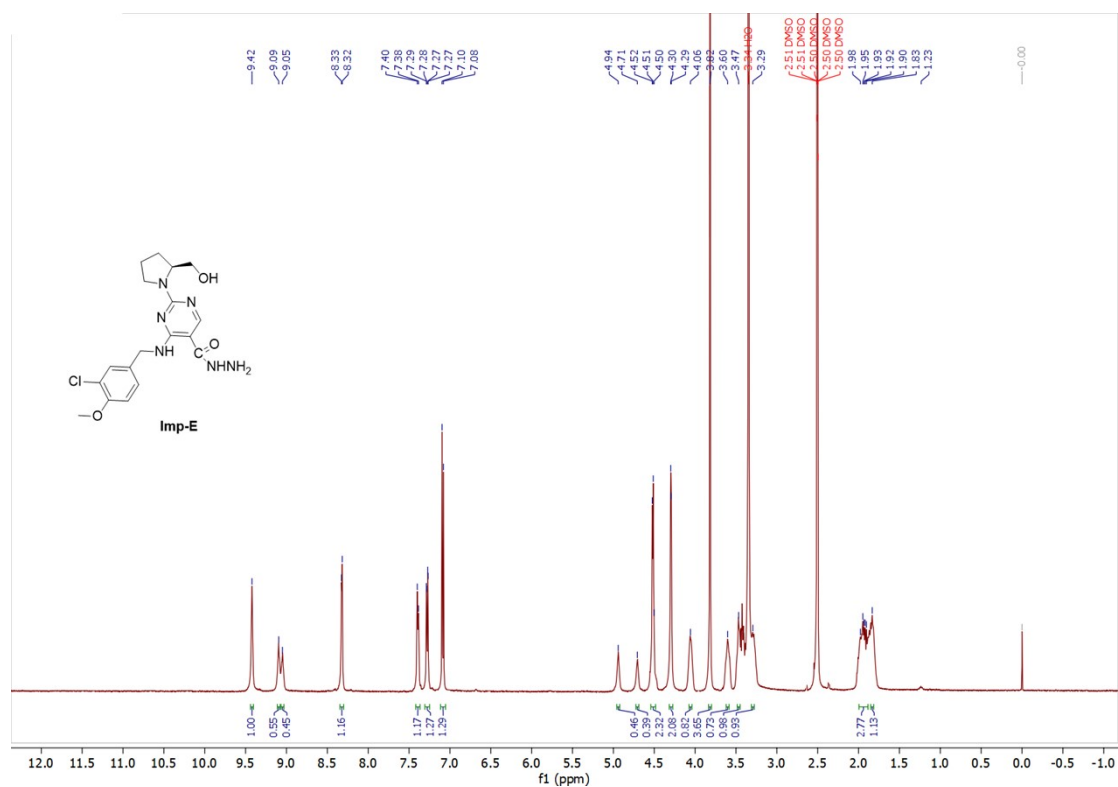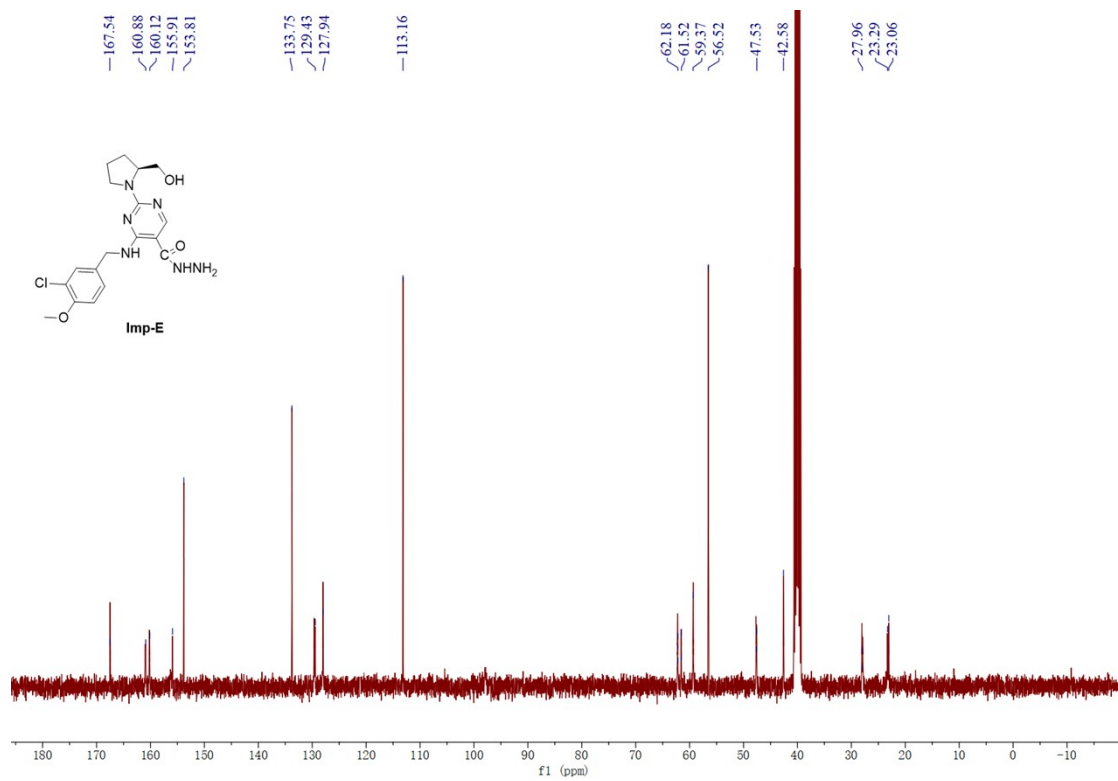

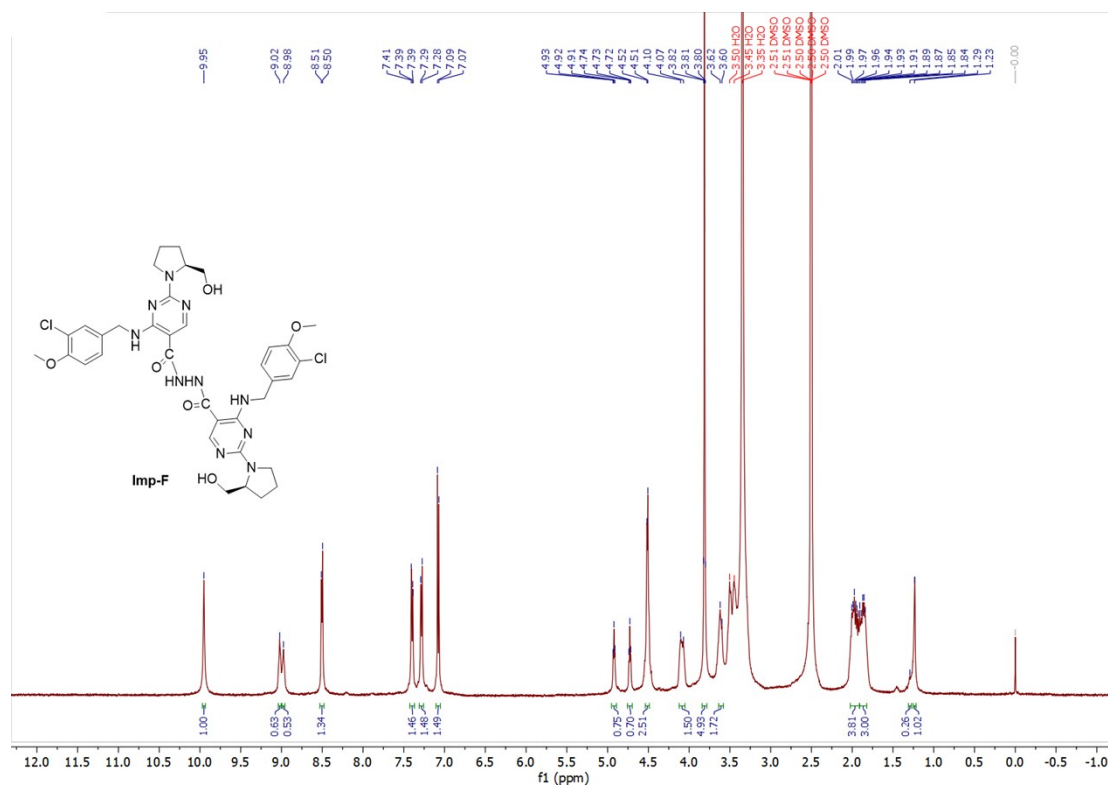

Figure S7 <sup>1</sup>H NMR spectra of Imp-F (DMSO-d<sub>6</sub>)

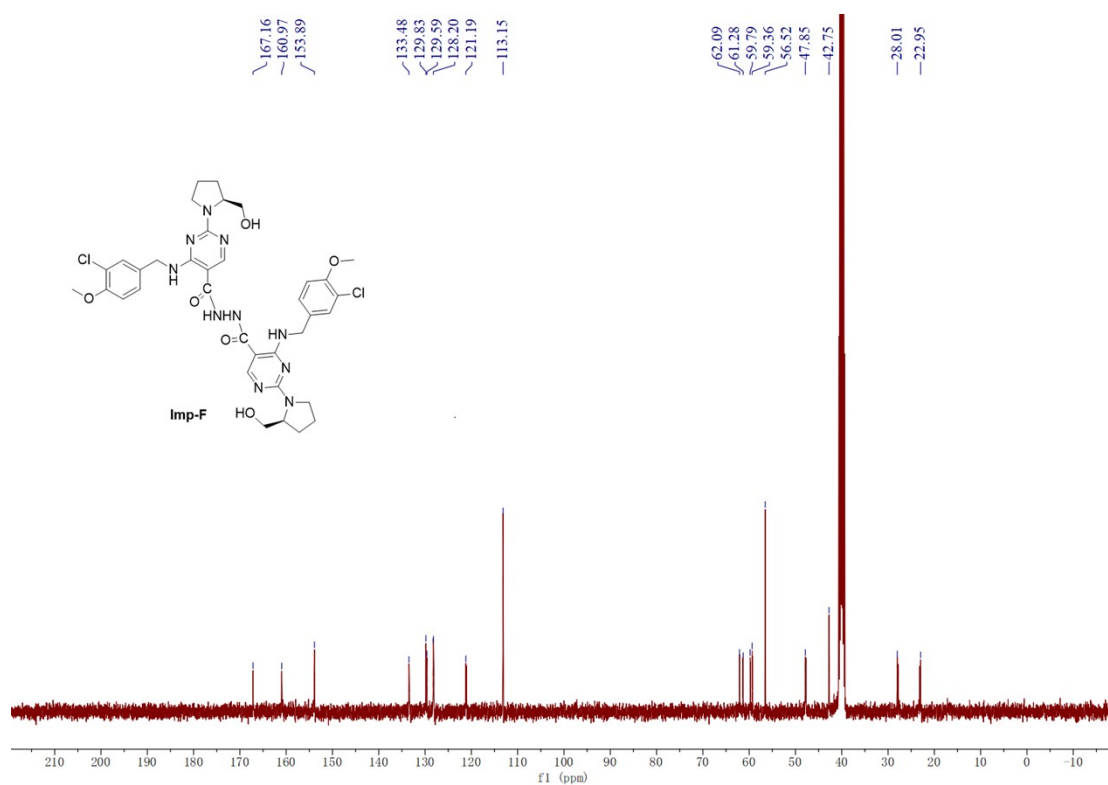

Figure S8 <sup>13</sup>C NMR spectra of Imp-F (DMSO-d<sub>6</sub>)

### III. Liquid chromatogram

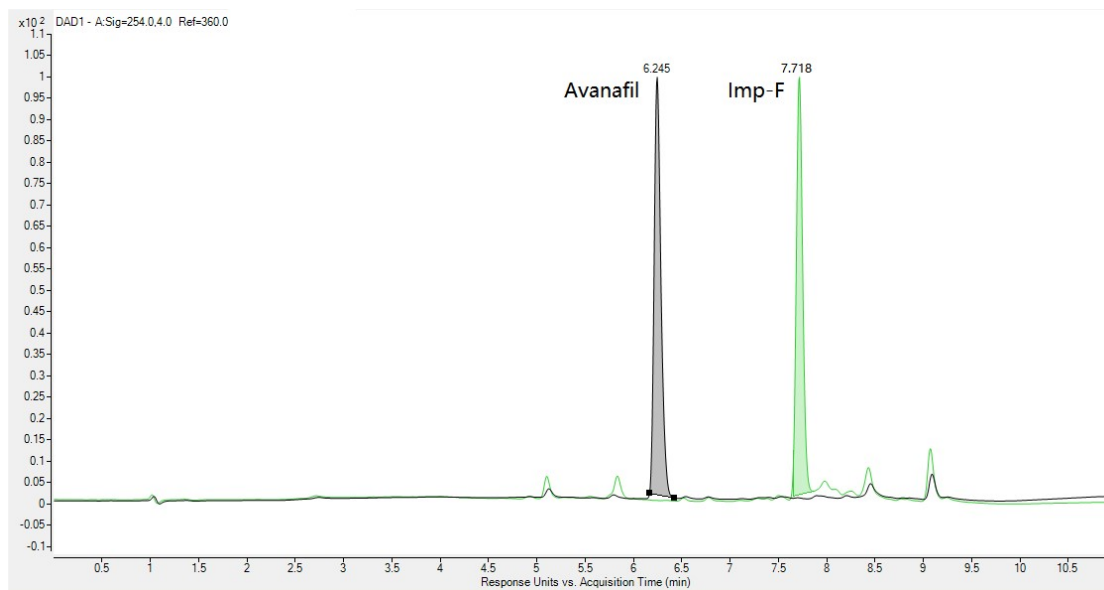

Figure S9. Liquid chromatogram of Avanafil and Imp-F.

### IV. Identification of TA98, TA97, TA100, TA1535, TA102

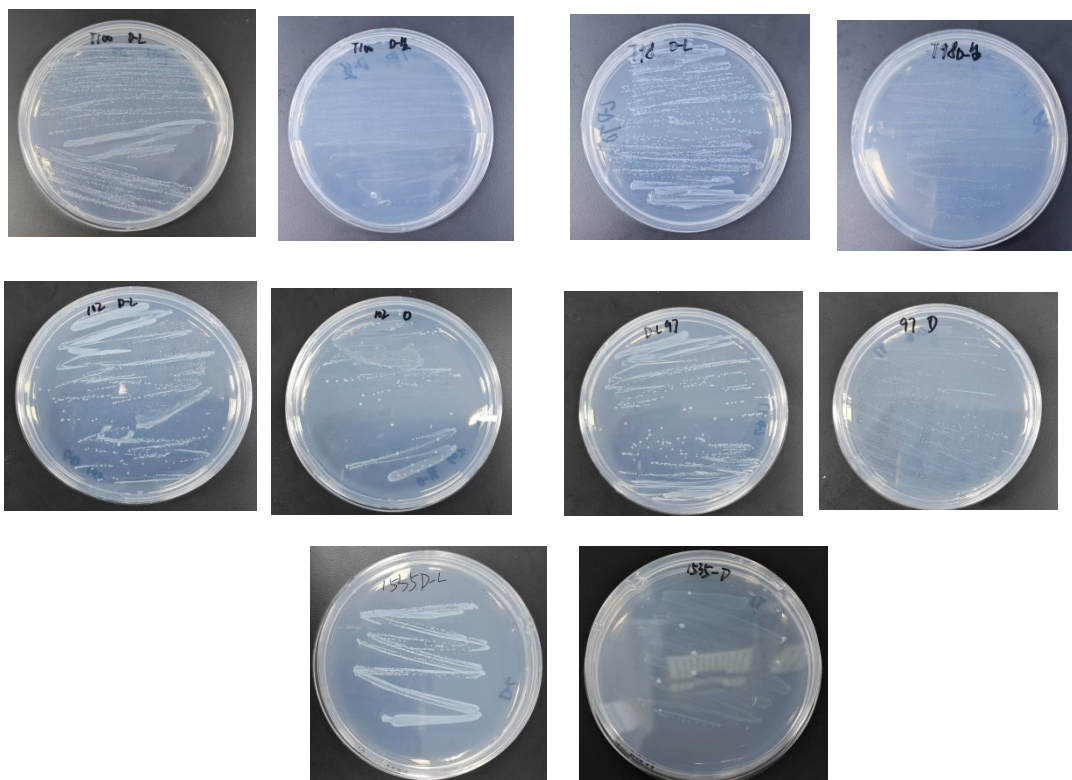

Figure S10 Identification of TA98, TA97, TA100, TA1535, TA102 histidine defects

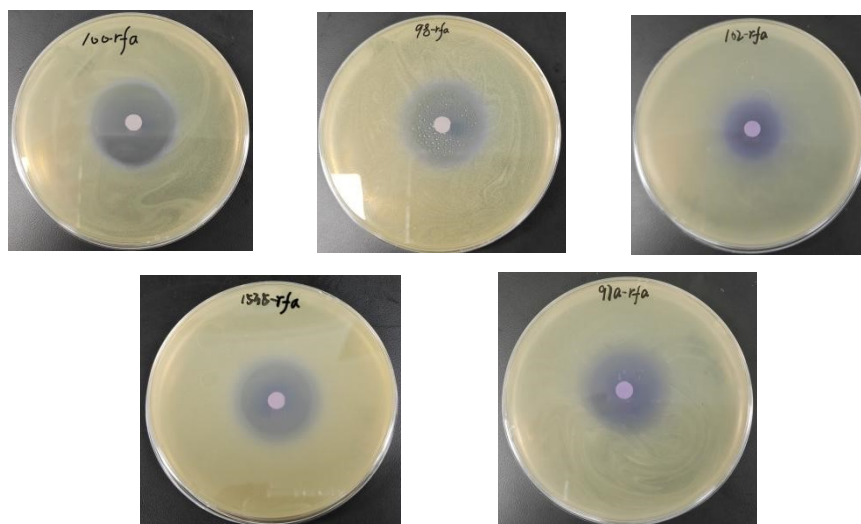

**Figure S11** Identification of lipopolysaccharide barrier defects of TA98, TA97a, TA100, TA1535, TA102

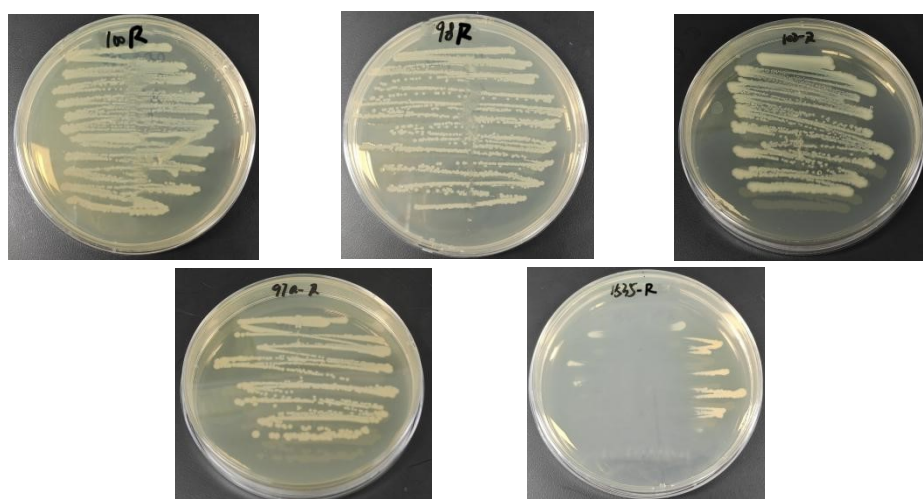

**Figure S12** Identification of TA98, TA97, TA100, TA1535, TA102 resistance to ampicillin

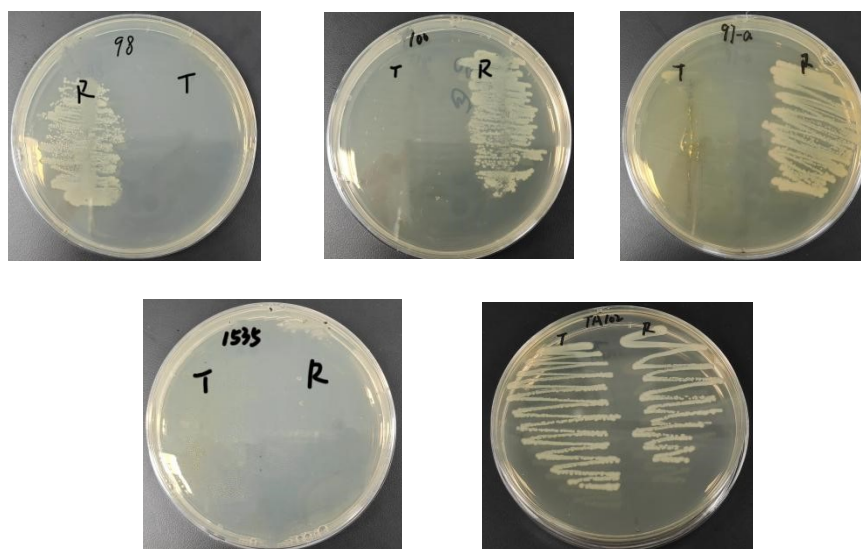

**Figure S13** Identification of tetracycline resistance of TA98, TA97, TA100, TA1535 and TA102

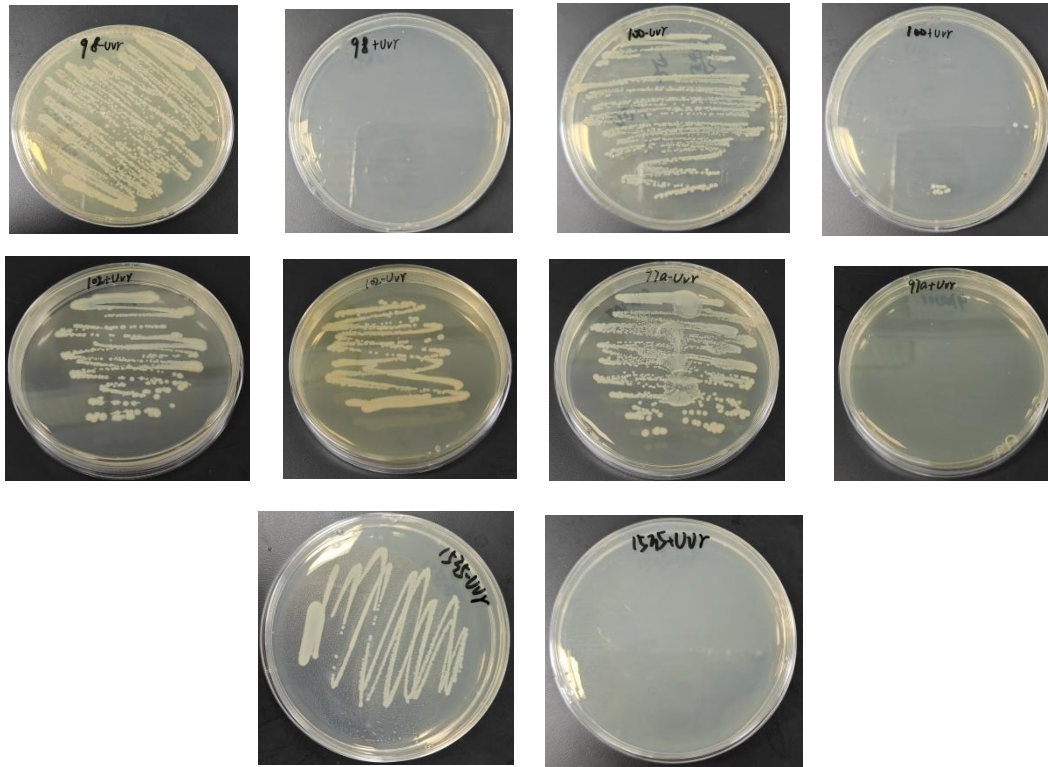

**Figure S14** uvrB repair defect identification of TA98, TA97, TA100, TA1535, TA102

## V. Prediction reports

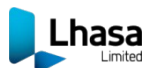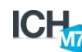

### ICH M7 Report

#### Report Information

|                                            |                                                |                                                    |
|--------------------------------------------|------------------------------------------------|----------------------------------------------------|
| <b>Author</b><br>admin                     | <b>Report date</b><br>30 October 2023 12:41:35 | <b>Prediction date</b><br>30 October 2023 12:40:53 |
| <b>Derek version</b><br>Derek Nexus: 6.2.1 | <b>Sarah version</b><br>Sarah Nexus: 3.2.1     | <b>Nexus Version</b><br>Nexus: 2.5.2               |
| <b>Species</b><br>bacterium                | <b>Endpoint</b><br>Mutagenicity in vitro       |                                                    |

#### Prediction Summary - Impurity-E.cdx

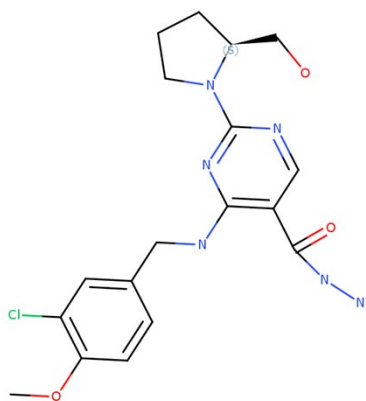

Derek: ++++ Plausible

Sarah: ---- Negative

Smiles:

C1(=C(C=CC(=C1)CNC2=C(C=NC(=N2)N3[C@@H](CCC3)CO)C(=O)NN)OC)Cl

|                          |         |
|--------------------------|---------|
| <b>Average Mol Mass:</b> | 406.87  |
| <b>Exact Mol Mass:</b>   | 406.152 |
| <b>Log Kp:</b>           | -3.78   |
| <b>Log P:</b>            | 2.0     |

#### Expert Review Summary

**In Silico Overall Conclusion: Positive (Calculated Call)**

**ICH M7 Cohort of Concern: No**

Review status: Review not started

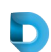

## Prediction Detail – Derek Nexus

| Derek Knowledge Base | Version | Last Modified Date  | Certified by                           |
|----------------------|---------|---------------------|----------------------------------------|
| Derek KB 2022 2.0    | 2.0     | 13/07/2022 18:02:45 | Lhasa Limited, Leeds, Yorkshire,<br>UK |
|                      |         | Perceive Mixtures   | Perceive Tautomers                     |
|                      |         | No                  | No                                     |

### Alert(s) matched:

Hydrazine or monoacyl- or monosulphonyl-hydrazine

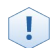

**Alert: 033 Hydrazine or monoacyl- or monosulphonyl-hydrazine (from KB: Derek KB 2022 2.0)**

### Alert Description Image

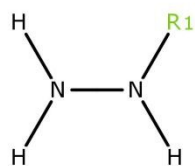

R1 = H, C=O, O=S=O

### Match with query compound

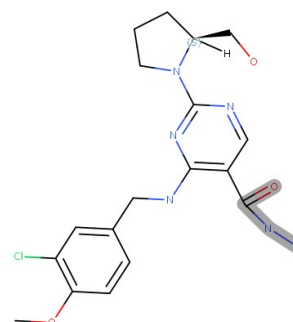

### Comments

Chromosome damage (clastogenicity): in vitro chromosome aberration test

Mutagenicity: Ames test

Able to release hydrazine or monoacyl- or monosulphonyl-hydrazine, but not from hydrazones.

Compounds that have tested positive in the Ames test include hydrazine sulphate [NTP], hydrazine hydrate [Parodi et al, Poso et al], carbamylhydrazine [Parodi et al] and isoniazid [Braun et al, Parodi et al], typically in *Salmonella typhimurium* strain TA1535. In general, activity is reported to be greater in the absence of S9 mix, and in the case of carbamylhydrazine, the addition of S9 mix removed activity.

Positive results in the in vitro chromosome aberration test have been reported for hydrazine sulphate [Natarajan and van Kesteren-van Leeuwen] and isoniazid [Sofuni].

## References

- Poso A, von Wright A and Gynther J. (1995)  
An empirical and theoretical study on mechanisms of mutagenic activity of hydrazine compounds., *Mutation Research*, 332 , 63-71  
DOI: 10.1016/0027-5107(95)00155-2
- Sofuni T (editor). (1999)  
Revised Edition 1998 Data Book of Chromosomal Aberration Test in Vitro., *Data Book of Chromosomal Aberration Test in Vitro*, , All pages
- Natarajan AT and van Kesteren-van Leeuwen AC. (1981)  
Mutagenic activity of 20 coded compounds in chromosome aberrations/sister chromatid exchanges assay using Chinese hamster ovary (CHO) cells., *Evaluation of Short-Term Tests for Carcinogens: Report of the International Collaborative Program (Progress in Mutation Research, volume 1)*, , 551-559
- National Toxicology Program (NTP). (1981)  
Salmonella study summary of hydrazine sulfate (CAS RN 10034-93-2)., *National Toxicology Program Web Server*, ,
- Braun R, Jakel HP and Schoneich J. (1984)  
Genetic effects of isoniazid and the relationship to in vivo and in vitro biotransformation., *Mutation Research*, 137 , 61-69
- Parodi S, de Flora S, Cavanna M, Pino A, Robbiano L, Bennicelli C and Brambilla G. (1981)  
DNA-damaging activity in vivo and bacterial mutagenicity of sixteen hydrazine derivatives as related quantitatively to their carcinogenicity., *Cancer Research*, 41 , 1469-1482

## Validation comments

Chromosome damage: in vitro chromosome aberration test

The alert has demonstrated the following predictive performance:

- 1) Sofuni data set: 0 compounds activate this alert
- 2) FDA CFSAN data set: 1 compound activates this alert of which 1 is reported positive (positive predictivity = 100%)
- 3) CGX data set: 2 compounds activate this alert of which 2 are reported positive (positive predictivity = 100%)

1) A collection of in vitro chromosome aberration test data for 712 compounds from the following source: Revised Edition 1998 Data Book of Chromosomal Aberration Test in Vitro, Sofuni T (editor), Life-Science Information Center, Tokyo, 1999.

2) A collection of in vitro chromosome aberration test data for 2172 compounds derived from the FDA/CFSAN/OFAS knowledge base.

3) A collection of in vitro chromosome aberration test data for 488 compounds from the following reference: Kirkland D, Aardema M, Henderson L and Muller L. Evaluation of the ability of a battery of three in vitro genotoxicity tests to discriminate rodent carcinogens and non-carcinogens. I. Sensitivity, specificity and relative predictivity. Mutation Research, 2005, 584, 1-256, available at "<http://dx.doi.org/10.1016/j.mrgentox.2005.02.004>".

In assessing predictive performance, it should be noted that:

- Mammalian in vitro chromosome damage predictions in Derek associated with a reasoning level of equivocal or above have been considered positive;
- Predictions do not take into account (i) the tautomeric forms of compounds or (ii) the individual components of mixtures;
- The classification of compounds from the Sofuni data set as positive or negative is based upon an overall result which includes both polyploidy and structural chromosome aberration results;
- The classification of compounds from the FDA CFSAN data set as positive or negative is based upon a composite activity score for aberrations in vitro;
- Compounds in the data sets assigned responses other than positive or negative have been excluded from the analysis;
- No account has been taken of other chromosome damage alerts which may also be present in some compounds;
- No comparison has been made between the protocol used to obtain positive experimental results, including exposure time and metabolic activation, and the expected profile which may be included in the comments for an alert;
- Information from the data sets may have been used previously as supporting evidence for the derivation of some alerts;
- Some compounds may be present in more than one of the data sets analysed.

Mutagenicity: Ames test

The alert has demonstrated the following predictive performance:

- 1) Proprietary data set 1: 9 compounds activate this alert of which 6 are reported positive (positive predictivity: 67%)
- 2) Proprietary data set 2: 0 compounds activate this alert
- 3) FDA CFSAN data set: 10 compounds activate this alert of which 6 are reported positive (positive predictivity: 60%)
- 1) A proprietary collection of Ames test data for 1812 chemicals.
- 2) A proprietary collection of Ames test data for 475 chemicals contributed by Bayer Schering Pharma AG.

3) A collection of Ames test data for 8421 compounds derived from the FDA/CFSAN/OFAS knowledge base.

In assessing predictive performance, it should be noted that:

- Bacterial mutagenicity predictions in Derek associated with a reasoning level of equivocal or above have been considered positive;
- Predictions do not take into account (i) the tautomeric forms of compounds or (ii) the individual components of mixtures;
- The classification of compounds from the FDA CFSAN data set as positive or negative is based upon composite activity scores for Salmonella and E.coli. Positive results in either Salmonella or E.coli leads to an overall active call;
- Compounds in the data sets assigned responses other than positive or negative have been excluded from the analysis;
- No account has been taken of other mutagenicity alerts which may also be present in some compounds;
- No comparison has been made between the strain and S9 dependency of positive experimental results and the expected profile which may be included in the comments for an alert;
- Information from the data sets may have been used previously as supporting evidence for the derivation of some alerts;
- Some compounds may be present in more than one of the data sets analysed.

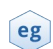

Examples for Alert 033 Hydrazine or monoacyl- or monosulphonyl-hydrazine

---

#### Example 1: hydrazine sulphate

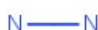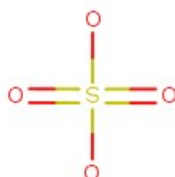

CAS Registry Number®: 10034-93-2

#### Test Data (hydrazine sulphate)

| 1) | Species                | Assay     | Endpoint(s)           | Result   |
|----|------------------------|-----------|-----------------------|----------|
|    | Salmonella typhimurium | Ames test | Mutagenicity in vitro | positive |

#### References

- National Toxicology Program (NTP). (1981)  
Salmonella study summary of hydrazine sulfate (CAS RN 10034-93-2)., *National Toxicology Program Web Server*, ,

#### Example 2: isoniazid

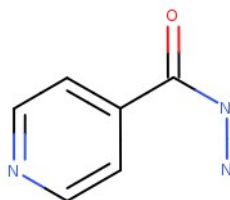

**CAS Registry Number®:** 54-85-3

#### Test Data (isoniazid)

| 1) | Species                | Assay     | Endpoint(s)           | Result   |
|----|------------------------|-----------|-----------------------|----------|
|    | Salmonella typhimurium | Ames test | Mutagenicity in vitro | positive |

#### References

- Braun R, Jakel HP and Schoneich J. (1984)  
Genetic effects of isoniazid and the relationship to in vivo and in vitro biotransformation., *Mutation Research*, 137 , 61-69
- Parodi S, de Flora S, Cavanna M, Pino A, Robbiano L, Bennicelli C and Brambilla G. (1981)  
DNA-damaging activity in vivo and bacterial mutagenicity of sixteen hydrazine derivatives as related quantitatively to their carcinogenicity., *Cancer Research*, 41 , 1469-1482

#### Example 3: hydrazine hydrate

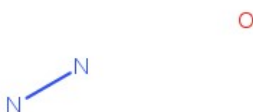

**CAS Registry Number®:** 7803-57-8

#### Test Data (hydrazine hydrate)

| 1) | Species                | Assay     | Endpoint(s)           | Result   |
|----|------------------------|-----------|-----------------------|----------|
|    | Salmonella typhimurium | Ames test | Mutagenicity in vitro | positive |

#### References

- Poso A, von Wright A and Gynther J. (1995)

An empirical and theoretical study on mechanisms of mutagenic activity of hydrazine compounds., *Mutation Research*, 332 , 63-71  
DOI: 10.1016/0027-5107(95)00155-2

---

***Mutagenicity in vitro* in bacterium is PLAUSIBLE (from KB: Derek KB 2022 2.0)**

---

The parameters that have influenced your prediction are: substructures in the input structure, which have the potential to cause mutagenicity; your selected species, which is bacterium.

**Rule 610:** If [species bacterium] is [certain] then [Species dependent variable 27] is [plausible]

- species bacterium is CERTAIN

In bacteria the variable "Species dependent variable 27" is plausible.

**Rule 83:** If [alert 033] is [certain] then [Mutagenicity in vitro] is [Species dependent variable 27]

- alert 033 is CERTAIN
- Species dependent variable 27 is PLAUSIBLE

If a chemical contains alert 33 then it is considered plausible that the chemical will cause mutagenicity in vitro in bacteria. The variation in rule outcome with species is achieved via use of the variable "Species dependent variable 27".

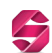

**Prediction Detail – Sarah Nexus**

---

| Sarah Model Name     | Version | Certified |
|----------------------|---------|-----------|
| Sarah Model - 2022.2 | 1.10    | Yes       |

The compound is predicted to be negative with 23% confidence for the 'Mutagenicity in vitro' endpoint in the model: 'Sarah Model - 2022.2'. Supporting hypotheses containing similar examples from the training set have been found.

## Hypotheses

| Structure                                                                         | ID    | Description | Result   | Confidence | Examples |
|-----------------------------------------------------------------------------------|-------|-------------|----------|------------|----------|
| 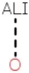 | H-309 | Hypothesis  | Negative | 24%        | 1672     |
| 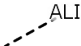 | H-294 | Hypothesis  | Negative | 23%        | 5948     |
| 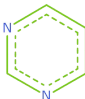 | H-190 | Hypothesis  | Negative | 23%        | 403      |

### Hypothesis: H-309

|                                                                                     |                                                                                                                   |
|-------------------------------------------------------------------------------------|-------------------------------------------------------------------------------------------------------------------|
| 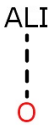 | <p><b>Sarah Result:</b> Negative</p> <p><b>Confidence:</b> 24%</p> <p><b>Examples:</b> 1672</p> <p>Hypothesis</p> |
|-------------------------------------------------------------------------------------|-------------------------------------------------------------------------------------------------------------------|

### Examples:

|                                                                                                                                                                                                                                                                                                 |                                                                                                                                                                                                                                                                                                                                                                                                                                                                                                                                                        |                                                                                                                                                                                                                                                                                                   |                                                                                                                                                                                                                                                                                                    |                                                                                                                                                                                                                                                                                                       |
|-------------------------------------------------------------------------------------------------------------------------------------------------------------------------------------------------------------------------------------------------------------------------------------------------|--------------------------------------------------------------------------------------------------------------------------------------------------------------------------------------------------------------------------------------------------------------------------------------------------------------------------------------------------------------------------------------------------------------------------------------------------------------------------------------------------------------------------------------------------------|---------------------------------------------------------------------------------------------------------------------------------------------------------------------------------------------------------------------------------------------------------------------------------------------------|----------------------------------------------------------------------------------------------------------------------------------------------------------------------------------------------------------------------------------------------------------------------------------------------------|-------------------------------------------------------------------------------------------------------------------------------------------------------------------------------------------------------------------------------------------------------------------------------------------------------|
| <p>1 of 1672<br/>Similarity: 68%<br/>Overall Call: (-Ve)</p> 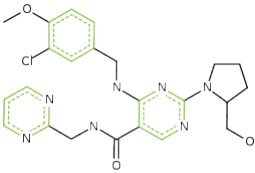 <p>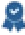 The training set compound has fired 0 Derek alert(s).</p> | <p>2 of 1672<br/>Similarity: 23%<br/>Overall Call: (-Ve)</p> 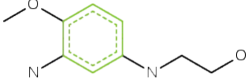 <p>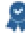 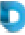 The training set compound has fired 1 Derek alert(s).</p> <p>0 alert(s) for toxicophores related to this hypothesis</p> <p>1 alert(s) for toxicophores not related to this hypothesis<br/>352: Aromatic amine or amide</p> | <p>3 of 1672<br/>Similarity: 22%<br/>Overall Call: (-Ve)</p> 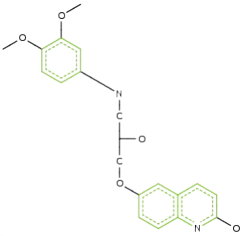 <p>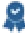 The training set compound has fired 0 Derek alert(s).</p> | <p>4 of 1672<br/>Similarity: 22%<br/>Overall Call: (-Ve)</p> 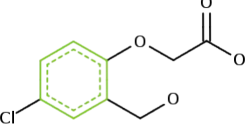 <p>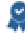 The training set compound has fired 0 Derek alert(s).</p> | <p>5 of 1672<br/>Similarity: 19%<br/>Overall Call: (-Ve)</p> 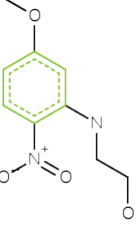 <p>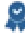 The training set compound has fired 0 Derek alert(s).</p> |
|-------------------------------------------------------------------------------------------------------------------------------------------------------------------------------------------------------------------------------------------------------------------------------------------------|--------------------------------------------------------------------------------------------------------------------------------------------------------------------------------------------------------------------------------------------------------------------------------------------------------------------------------------------------------------------------------------------------------------------------------------------------------------------------------------------------------------------------------------------------------|---------------------------------------------------------------------------------------------------------------------------------------------------------------------------------------------------------------------------------------------------------------------------------------------------|----------------------------------------------------------------------------------------------------------------------------------------------------------------------------------------------------------------------------------------------------------------------------------------------------|-------------------------------------------------------------------------------------------------------------------------------------------------------------------------------------------------------------------------------------------------------------------------------------------------------|



|                                                                                                                                                                                                                                                                                                  |                                                                                                                                                                                                                                                                                                    |                                                                                                                                                                                                                                                                                                                                                                                                                                                                                                                                                   |                                                                                                                                                                                                                                                                                                     |                                                                                                                                                                                                                                                                                                                                                                                                                                                                                                                                               |
|--------------------------------------------------------------------------------------------------------------------------------------------------------------------------------------------------------------------------------------------------------------------------------------------------|----------------------------------------------------------------------------------------------------------------------------------------------------------------------------------------------------------------------------------------------------------------------------------------------------|---------------------------------------------------------------------------------------------------------------------------------------------------------------------------------------------------------------------------------------------------------------------------------------------------------------------------------------------------------------------------------------------------------------------------------------------------------------------------------------------------------------------------------------------------|-----------------------------------------------------------------------------------------------------------------------------------------------------------------------------------------------------------------------------------------------------------------------------------------------------|-----------------------------------------------------------------------------------------------------------------------------------------------------------------------------------------------------------------------------------------------------------------------------------------------------------------------------------------------------------------------------------------------------------------------------------------------------------------------------------------------------------------------------------------------|
| <p>21 of 1672<br/>Similarity: 16%<br/>Overall Call: (-Ve)</p> 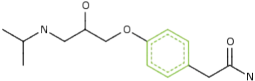 <p>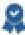 The training set compound has fired 0 Derek alert(s).</p>     | <p>22 of 1672<br/>Similarity: 16%<br/>Overall Call: (+Ve)</p> 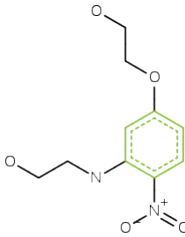 <p>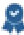 The training set compound has fired 0 Derek alert(s).</p>     | <p>23 of 1672<br/>Similarity: 16%<br/>Overall Call: (+Ve)</p> 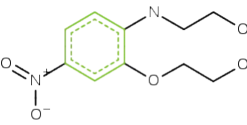 <p>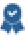 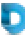 The training set compound has fired 1 Derek alert(s).</p> <p>0 alert(s) for toxicophores related to this hypothesis</p> <p>1 alert(s) for toxicophores not related to this hypothesis<br/>329: Aromatic nitro compound</p> | <p>24 of 1672<br/>Similarity: 16%<br/>Overall Call: (-Ve)</p> 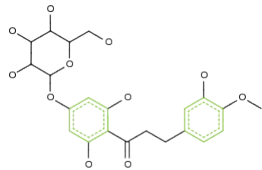 <p>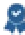 The training set compound has fired 0 Derek alert(s).</p>     | <p>25 of 1672<br/>Similarity: 16%<br/>Overall Call: (-Ve)</p> 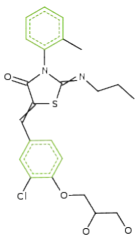 <p> The training set compound has fired 0 Derek alert(s).</p>                                                                                                                                                                                                                                            |
| <p>26 of 1672<br/>Similarity: 16%<br/>Overall Call: (+Ve)</p> 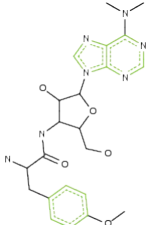 <p>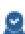 The training set compound has fired 0 Derek alert(s).</p> | <p>27 of 1672<br/>Similarity: 16%<br/>Overall Call: (+Ve)</p> 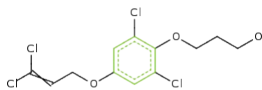 <p>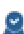 The training set compound has fired 0 Derek alert(s).</p>   | <p>28 of 1672<br/>Similarity: 16%<br/>Overall Call: (-Ve)</p> 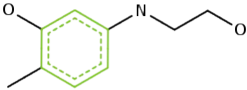 <p>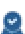 The training set compound has fired 0 Derek alert(s).</p>                                                                                                                                                                                                                                                  | <p>29 of 1672<br/>Similarity: 16%<br/>Overall Call: (+Ve)</p> 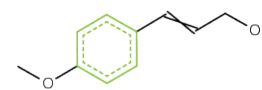 <p>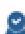 The training set compound has fired 0 Derek alert(s).</p>   | <p>30 of 1672<br/>Similarity: 16%<br/>Overall Call: (-Ve)</p> 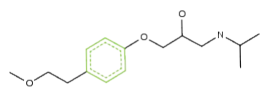 <p> The training set compound has fired 0 Derek alert(s).</p>                                                                                                                                                                                                                                          |
| <p>31 of 1672<br/>Similarity: 16%<br/>Overall Call: (-Ve)</p> 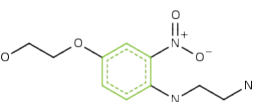 <p>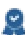 The training set compound has fired 0 Derek alert(s).</p> | <p>32 of 1672<br/>Similarity: 16%<br/>Overall Call: (-Ve)</p> 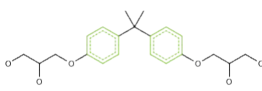 <p>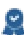 The training set compound has fired 0 Derek alert(s).</p> | <p>33 of 1672<br/>Similarity: 16%<br/>Overall Call: (+Ve)</p> 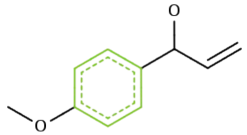 <p>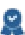 The training set compound has fired 0 Derek alert(s).</p>                                                                                                                                                                                                                                                | <p>34 of 1672<br/>Similarity: 16%<br/>Overall Call: (-Ve)</p> 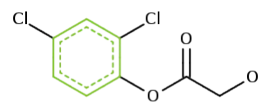 <p>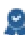 The training set compound has fired 0 Derek alert(s).</p> | <p>35 of 1672<br/>Similarity: 16%<br/>Overall Call: (+Ve)</p> 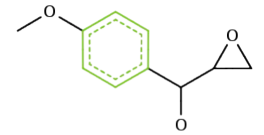 <p> 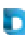 The training set compound has fired 1 Derek alert(s).</p> <p>0 alert(s) for toxicophores related to this hypothesis</p> <p>1 alert(s) for toxicophores not related to this hypothesis<br/>019: Epoxide</p> |

|                                                                                                                                                                                                                                                                                                  |                                                                                                                                                                                                                                                                                                                                                                                                                                                                                                                                                  |                                                                                                                                                                                                                                                                                                    |                                                                                                                                                                                                                                                                                                     |                                                                                                                                                                                                                                                                                                        |
|--------------------------------------------------------------------------------------------------------------------------------------------------------------------------------------------------------------------------------------------------------------------------------------------------|--------------------------------------------------------------------------------------------------------------------------------------------------------------------------------------------------------------------------------------------------------------------------------------------------------------------------------------------------------------------------------------------------------------------------------------------------------------------------------------------------------------------------------------------------|----------------------------------------------------------------------------------------------------------------------------------------------------------------------------------------------------------------------------------------------------------------------------------------------------|-----------------------------------------------------------------------------------------------------------------------------------------------------------------------------------------------------------------------------------------------------------------------------------------------------|--------------------------------------------------------------------------------------------------------------------------------------------------------------------------------------------------------------------------------------------------------------------------------------------------------|
| <p>36 of 1672<br/>Similarity: 15%<br/>Overall Call: (-Ve)</p> 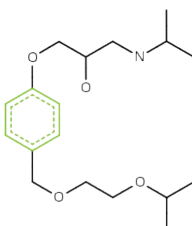 <p>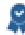 The training set compound has fired 0 Derek alert(s).</p>    | <p>37 of 1672<br/>Similarity: 15%<br/>Overall Call: (+Ve)</p> 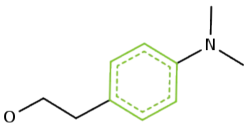 <p> The training set compound has fired 0 Derek alert(s).</p>                                                                                                                                                                                                                                                   | <p>38 of 1672<br/>Similarity: 15%<br/>Overall Call: (-Ve)</p> 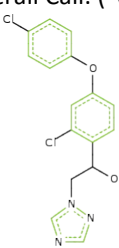 <p> The training set compound has fired 0 Derek alert(s).</p>     | <p>39 of 1672<br/>Similarity: 15%<br/>Overall Call: (-Ve)</p> 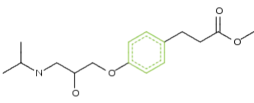 <p> The training set compound has fired 0 Derek alert(s).</p>     | <p>40 of 1672<br/>Similarity: 15%<br/>Overall Call: (-Ve)</p> 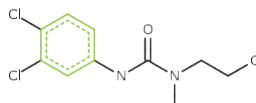 <p>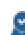 The training set compound has fired 0 Derek alert(s).</p>     |
| <p>41 of 1672<br/>Similarity: 15%<br/>Overall Call: (+Ve)</p> 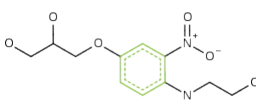 <p>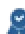 The training set compound has fired 0 Derek alert(s).</p>   | <p>42 of 1672<br/>Similarity: 15%<br/>Overall Call: (-Ve)</p> 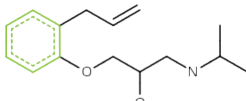 <p>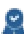 The training set compound has fired 0 Derek alert(s).</p>                                                                                                                                                                                                                                                 | <p>43 of 1672<br/>Similarity: 15%<br/>Overall Call: (-Ve)</p> 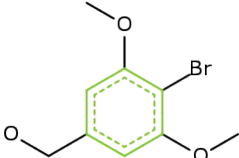 <p>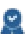 The training set compound has fired 0 Derek alert(s).</p>   | <p>44 of 1672<br/>Similarity: 15%<br/>Overall Call: (-Ve)</p> 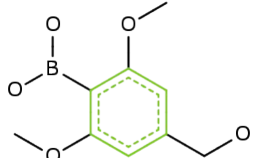 <p>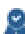 The training set compound has fired 0 Derek alert(s).</p>   | <p>45 of 1672<br/>Similarity: 15%<br/>Overall Call: (-Ve)</p> 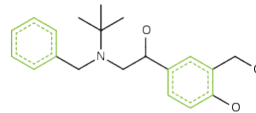 <p>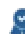 The training set compound has fired 0 Derek alert(s).</p>   |
| <p>46 of 1672<br/>Similarity: 15%<br/>Overall Call: (-Ve)</p> 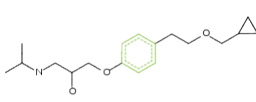 <p>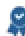 The training set compound has fired 0 Derek alert(s).</p> | <p>47 of 1672<br/>Similarity: 15%<br/>Overall Call: (+Ve)</p> 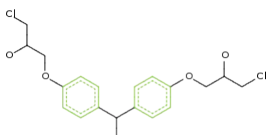 <p>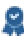 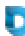 The training set compound has fired 1 Derek alert(s).</p> <p>0 alert(s) for toxicophores related to this hypothesis</p> <p>1 alert(s) for toxicophores not related to this hypothesis<br/>027: Alkylating agent</p> | <p>48 of 1672<br/>Similarity: 15%<br/>Overall Call: (-Ve)</p> 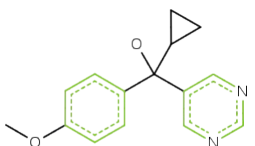 <p>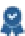 The training set compound has fired 0 Derek alert(s).</p> | <p>49 of 1672<br/>Similarity: 15%<br/>Overall Call: (+Ve)</p> 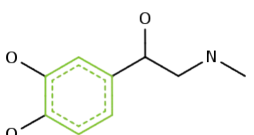 <p>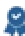 The training set compound has fired 0 Derek alert(s).</p> | <p>50 of 1672<br/>Similarity: 15%<br/>Overall Call: (-Ve)</p> 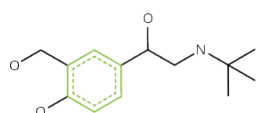 <p>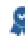 The training set compound has fired 0 Derek alert(s).</p> |

## Hypothesis: H-294

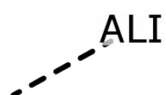

**Sarah Result:** Negative

**Confidence:** 23%

**Examples:** 5948

Hypothesis

### Examples:

|                                                                                                                                                                                                                                                                                            |                                                                                                                           |                                                                                                                                                                                                                                                                            |                                                                                                                                                                                                                                                                                |                                                                                                                                                                                                                                                                                     |
|--------------------------------------------------------------------------------------------------------------------------------------------------------------------------------------------------------------------------------------------------------------------------------------------|---------------------------------------------------------------------------------------------------------------------------|----------------------------------------------------------------------------------------------------------------------------------------------------------------------------------------------------------------------------------------------------------------------------|--------------------------------------------------------------------------------------------------------------------------------------------------------------------------------------------------------------------------------------------------------------------------------|-------------------------------------------------------------------------------------------------------------------------------------------------------------------------------------------------------------------------------------------------------------------------------------|
| <p>1 of 5948<br/>Similarity: 68%<br/>Overall Call: (-Ve)</p> <p>The training set compound has fired 0 Derek alert(s).</p>                                                                                                                                                                  | <p>2 of 5948<br/>Similarity: 27%<br/>Overall Call: (-Ve)</p> <p>The training set compound has fired 0 Derek alert(s).</p> | <p>3 of 5948<br/>Similarity: 24%<br/>Overall Call: (+Ve)</p> <p>The training set compound has fired 1 Derek alert(s).</p> <p>0 alert(s) for toxicophores related to this hypothesis</p> <p>1 alert(s) for toxicophores not related to this hypothesis<br/>019: Epoxide</p> | <p>4 of 5948<br/>Similarity: 24%<br/>Overall Call: (-Ve)</p> <p>The training set compound has fired 0 Derek alert(s).</p>                                                                                                                                                      | <p>5 of 5948<br/>Similarity: 23%<br/>Overall Call: (+Ve)</p> <p>The training set compound has fired 1 Derek alert(s).</p> <p>0 alert(s) for toxicophores related to this hypothesis</p> <p>1 alert(s) for toxicophores not related to this hypothesis<br/>027: Alkylating agent</p> |
| <p>6 of 5948<br/>Similarity: 23%<br/>Overall Call: (-Ve)</p> <p>The training set compound has fired 1 Derek alert(s).</p> <p>0 alert(s) for toxicophores related to this hypothesis</p> <p>1 alert(s) for toxicophores not related to this hypothesis<br/>352: Aromatic amine or amide</p> | <p>7 of 5948<br/>Similarity: 22%<br/>Overall Call: (-Ve)</p> <p>The training set compound has fired 0 Derek alert(s).</p> | <p>8 of 5948<br/>Similarity: 22%<br/>Overall Call: (-Ve)</p> <p>The training set compound has fired 0 Derek alert(s).</p>                                                                                                                                                  | <p>9 of 5948<br/>Similarity: 22%<br/>Overall Call: (+Ve)</p> <p>The training set compound has fired 1 Derek alert(s).</p> <p>0 alert(s) for toxicophores related to this hypothesis</p> <p>1 alert(s) for toxicophores not related to this hypothesis<br/>315: Acid halide</p> | <p>10 of 5948<br/>Similarity: 22%<br/>Overall Call: (-Ve)</p> <p>The training set compound has fired 0 Derek alert(s).</p>                                                                                                                                                          |

|                                                                                                                                                                                                                                                                                                                                                                                                                                                                |                                                                                                                                                                                                                                                                                                    |                                                                                                                                                                                                                                                                                                                                                                                                                                                                     |                                                                                                                                                                                                                                                                                                                                                                                                                                                                     |                                                                                                                                                                                                                                                                                                        |
|----------------------------------------------------------------------------------------------------------------------------------------------------------------------------------------------------------------------------------------------------------------------------------------------------------------------------------------------------------------------------------------------------------------------------------------------------------------|----------------------------------------------------------------------------------------------------------------------------------------------------------------------------------------------------------------------------------------------------------------------------------------------------|---------------------------------------------------------------------------------------------------------------------------------------------------------------------------------------------------------------------------------------------------------------------------------------------------------------------------------------------------------------------------------------------------------------------------------------------------------------------|---------------------------------------------------------------------------------------------------------------------------------------------------------------------------------------------------------------------------------------------------------------------------------------------------------------------------------------------------------------------------------------------------------------------------------------------------------------------|--------------------------------------------------------------------------------------------------------------------------------------------------------------------------------------------------------------------------------------------------------------------------------------------------------|
| <p>11 of 5948<br/>Similarity: 21%<br/>Overall Call: (+Ve)</p> 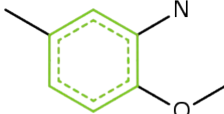 <p>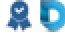 The training set compound has fired 1 Derek alert(s).</p> <p>0 alert(s) for toxicophores related to this hypothesis</p> <p>1 alert(s) for toxicophores not related to this hypothesis<br/>352: Aromatic amine or amide</p> | <p>12 of 5948<br/>Similarity: 21%<br/>Overall Call: (+Ve)</p> 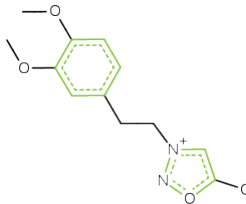 <p>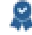 The training set compound has fired 0 Derek alert(s).</p>     | <p>13 of 5948<br/>Similarity: 21%<br/>Overall Call: (-Ve)</p> 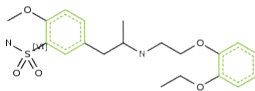 <p>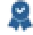 The training set compound has fired 0 Derek alert(s).</p>                                                                                                                                                                      | <p>14 of 5948<br/>Similarity: 20%<br/>Overall Call: (-Ve)</p> 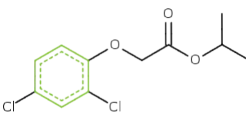 <p>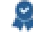 The training set compound has fired 0 Derek alert(s).</p>                                                                                                                                                                     | <p>15 of 5948<br/>Similarity: 20%<br/>Overall Call: (-Ve)</p> 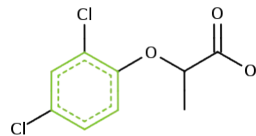 <p>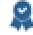 The training set compound has fired 0 Derek alert(s).</p>     |
| <p>16 of 5948<br/>Similarity: 20%<br/>Overall Call: (-Ve)</p> 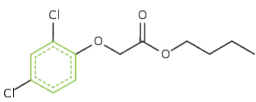 <p>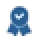 The training set compound has fired 0 Derek alert(s).</p>                                                                                                                                                                | <p>17 of 5948<br/>Similarity: 20%<br/>Overall Call: (-Ve)</p> 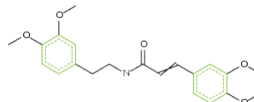 <p>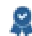 The training set compound has fired 0 Derek alert(s).</p>  | <p>18 of 5948<br/>Similarity: 20%<br/>Overall Call: (-Ve)</p> 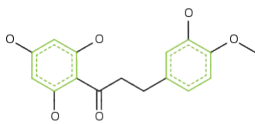 <p>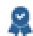 The training set compound has fired 0 Derek alert(s).</p>                                                                                                                                                                   | <p>19 of 5948<br/>Similarity: 20%<br/>Overall Call: (+Ve)</p> 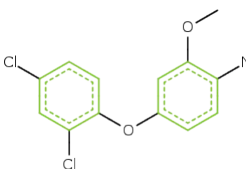 <p>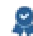 The training set compound has fired 1 Derek alert(s).</p> <p>0 alert(s) for toxicophores related to this hypothesis</p> <p>1 alert(s) for toxicophores not related to this hypothesis<br/>352: Aromatic amine or amide</p> | <p>20 of 5948<br/>Similarity: 19%<br/>Overall Call: (-Ve)</p> 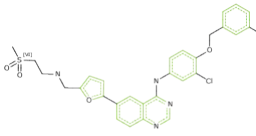 <p>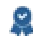 The training set compound has fired 0 Derek alert(s).</p>  |
| <p>21 of 5948<br/>Similarity: 19%<br/>Overall Call: (-Ve)</p> 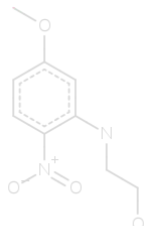 <p>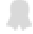 The training set compound has fired 0 Derek alert(s).</p>                                                                                                                                                              | <p>22 of 5948<br/>Similarity: 19%<br/>Overall Call: (+Ve)</p> 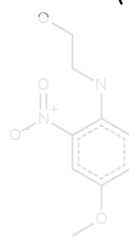 <p>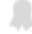 The training set compound has fired 0 Derek alert(s).</p> | <p>23 of 5948<br/>Similarity: 19%<br/>Overall Call: (+Ve)</p> 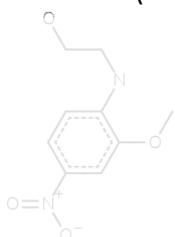 <p>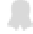 The training set compound has fired 1 Derek alert(s).</p> <p>0 alert(s) for toxicophores related to this hypothesis</p> <p>1 alert(s) for toxicophores not related to this hypothesis<br/>329: Aromatic nitro compound</p> | <p>24 of 5948<br/>Similarity: 19%<br/>Overall Call: (+Ve)</p> 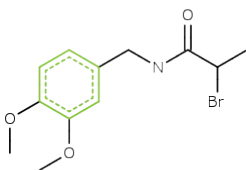 <p>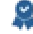 The training set compound has fired 1 Derek alert(s).</p> <p>0 alert(s) for toxicophores related to this hypothesis</p> <p>1 alert(s) for toxicophores not related to this hypothesis<br/>027: Alkylating agent</p>       | <p>25 of 5948<br/>Similarity: 19%<br/>Overall Call: (-Ve)</p> 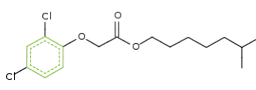 <p>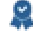 The training set compound has fired 0 Derek alert(s).</p> |

|                                                                                                                                                                                                                                                                                                                                                                                                                                                                                                                                       |                                                                                                                                                                                                                                                                                                                                                                                                                                                                                                                                                         |                                                                                                                                                                                                                                                                                                    |                                                                                                                                                                                                                                                                                                                                                                                                                                                                                                                                                       |                                                                                                                                                                                                                                                                                                                                                                                                                                                                                                                                                  |
|---------------------------------------------------------------------------------------------------------------------------------------------------------------------------------------------------------------------------------------------------------------------------------------------------------------------------------------------------------------------------------------------------------------------------------------------------------------------------------------------------------------------------------------|---------------------------------------------------------------------------------------------------------------------------------------------------------------------------------------------------------------------------------------------------------------------------------------------------------------------------------------------------------------------------------------------------------------------------------------------------------------------------------------------------------------------------------------------------------|----------------------------------------------------------------------------------------------------------------------------------------------------------------------------------------------------------------------------------------------------------------------------------------------------|-------------------------------------------------------------------------------------------------------------------------------------------------------------------------------------------------------------------------------------------------------------------------------------------------------------------------------------------------------------------------------------------------------------------------------------------------------------------------------------------------------------------------------------------------------|--------------------------------------------------------------------------------------------------------------------------------------------------------------------------------------------------------------------------------------------------------------------------------------------------------------------------------------------------------------------------------------------------------------------------------------------------------------------------------------------------------------------------------------------------|
| <p>26 of 5948<br/>Similarity: 19%<br/>Overall Call: (-Ve)</p> 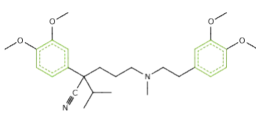 <p>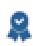 The training set compound has fired 0 Derek alert(s).</p>                                                                                                                                                                                                                                          | <p>27 of 5948<br/>Similarity: 19%<br/>Overall Call: (-Ve)</p> 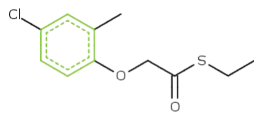 <p>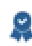 The training set compound has fired 0 Derek alert(s).</p>                                                                                                                                                                                                                                                          | <p>28 of 5948<br/>Similarity: 19%<br/>Overall Call: (-Ve)</p> 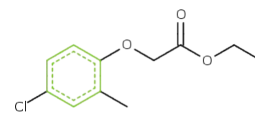 <p>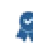 The training set compound has fired 0 Derek alert(s).</p>     | <p>29 of 5948<br/>Similarity: 19%<br/>Overall Call: (-Ve)</p> 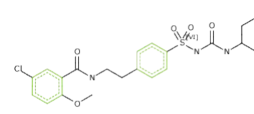 <p>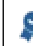 The training set compound has fired 0 Derek alert(s).</p>                                                                                                                                                                                                                                                       | <p>30 of 5948<br/>Similarity: 19%<br/>Overall Call: (+Ve)</p> 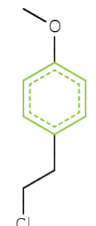 <p>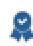 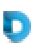 The training set compound has fired 1 Derek alert(s).</p> <p>0 alert(s) for toxicophores related to this hypothesis</p> <p>1 alert(s) for toxicophores not related to this hypothesis<br/>027: Alkylating agent</p> |
| <p>31 of 5948<br/>Similarity: 19%<br/>Overall Call: (-Ve)</p> 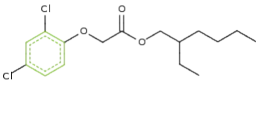 <p>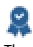 The training set compound has fired 0 Derek alert(s).</p>                                                                                                                                                                                                                                       | <p>32 of 5948<br/>Similarity: 19%<br/>Overall Call: (-Ve)</p> 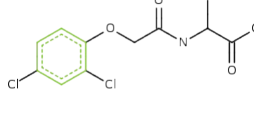 <p>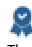 The training set compound has fired 0 Derek alert(s).</p>                                                                                                                                                                                                                                                       | <p>33 of 5948<br/>Similarity: 19%<br/>Overall Call: (-Ve)</p> 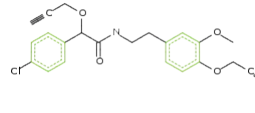 <p>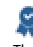 The training set compound has fired 0 Derek alert(s).</p>  | <p>34 of 5948<br/>Similarity: 19%<br/>Overall Call: (+Ve)</p> 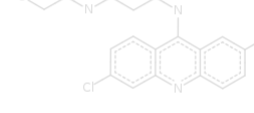 <p>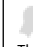 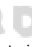 The training set compound has fired 1 Derek alert(s).</p> <p>0 alert(s) for toxicophores related to this hypothesis</p> <p>1 alert(s) for toxicophores not related to this hypothesis<br/>365: Acridine or analogue</p> | <p>35 of 5948<br/>Similarity: 19%<br/>Overall Call: (-Ve)</p> 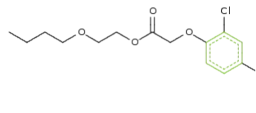 <p>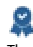 The training set compound has fired 0 Derek alert(s).</p>                                                                                                                                                                                                                                            |
| <p>36 of 5948<br/>Similarity: 19%<br/>Overall Call: (+Ve)</p> 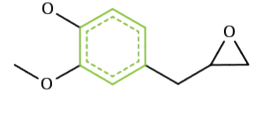 <p>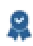 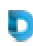 The training set compound has fired 1 Derek alert(s).</p> <p>0 alert(s) for toxicophores related to this hypothesis</p> <p>1 alert(s) for toxicophores not related to this hypothesis<br/>019: Epoxide</p> | <p>37 of 5948<br/>Similarity: 19%<br/>Overall Call: (+Ve)</p> 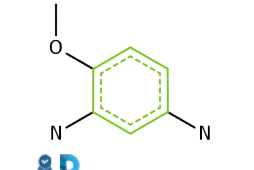 <p>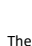 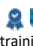 The training set compound has fired 1 Derek alert(s).</p> <p>0 alert(s) for toxicophores related to this hypothesis</p> <p>1 alert(s) for toxicophores not related to this hypothesis<br/>352: Aromatic amine or amide</p> | <p>38 of 5948<br/>Similarity: 19%<br/>Overall Call: (-Ve)</p> 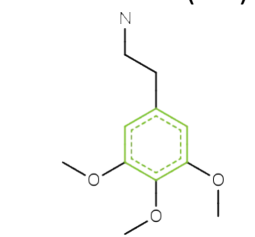 <p>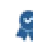 The training set compound has fired 0 Derek alert(s).</p> | <p>39 of 5948<br/>Similarity: 18%<br/>Overall Call: (-Ve)</p> 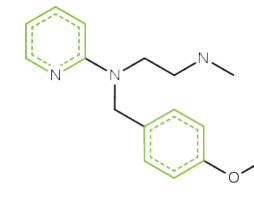 <p>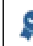 The training set compound has fired 0 Derek alert(s).</p>                                                                                                                                                                                                                                                   | <p>40 of 5948<br/>Similarity: 18%<br/>Overall Call: (-Ve)</p> 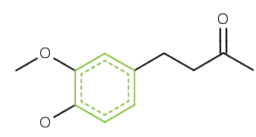 <p>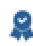 The training set compound has fired 0 Derek alert(s).</p>                                                                                                                                                                                                                                           |

|                                                                                                                                                                                                                                                                                                                                                                                |                                                                                                                                                                                                                                                                                                                                                                               |                                                                                                                                                                                                                                                                                                                                                                               |                                                                                                                                                                                                                                                                                                                                                                                                                  |                                                                                                                                                                                                                 |
|--------------------------------------------------------------------------------------------------------------------------------------------------------------------------------------------------------------------------------------------------------------------------------------------------------------------------------------------------------------------------------|-------------------------------------------------------------------------------------------------------------------------------------------------------------------------------------------------------------------------------------------------------------------------------------------------------------------------------------------------------------------------------|-------------------------------------------------------------------------------------------------------------------------------------------------------------------------------------------------------------------------------------------------------------------------------------------------------------------------------------------------------------------------------|------------------------------------------------------------------------------------------------------------------------------------------------------------------------------------------------------------------------------------------------------------------------------------------------------------------------------------------------------------------------------------------------------------------|-----------------------------------------------------------------------------------------------------------------------------------------------------------------------------------------------------------------|
| <p>41 of 5948<br/>Similarity: 18%<br/>Overall Call: (-Ve)</p> 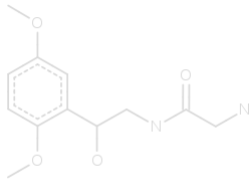 <p>The training set compound has fired 0 Derek alert(s).</p> <p>0 alert(s) for toxicophores related to this hypothesis</p> <p>1 alert(s) for toxicophores not related to this hypothesis<br/>329: Aromatic nitro compound</p>   | <p>42 of 5948<br/>Similarity: 18%<br/>Overall Call: (+Ve)</p> 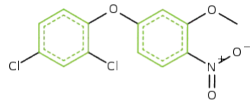 <p>The training set compound has fired 1 Derek alert(s).</p> <p>0 alert(s) for toxicophores related to this hypothesis</p> <p>1 alert(s) for toxicophores not related to this hypothesis<br/>329: Aromatic nitro compound</p> | <p>43 of 5948<br/>Similarity: 18%<br/>Overall Call: (-Ve)</p> 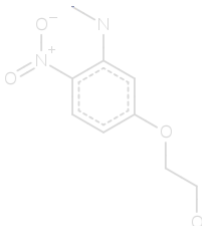 <p>The training set compound has fired 1 Derek alert(s).</p> <p>0 alert(s) for toxicophores related to this hypothesis</p> <p>1 alert(s) for toxicophores not related to this hypothesis<br/>352: Aromatic amine or amide</p> | <p>44 of 5948<br/>Similarity: 18%<br/>Overall Call: (-Ve)</p> 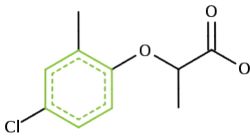 <p>The training set compound has fired 0 Derek alert(s).</p>                                                                                                                                                                                                    | <p>45 of 5948<br/>Similarity: 18%<br/>Overall Call: (-Ve)</p> 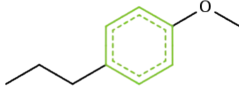 <p>The training set compound has fired 0 Derek alert(s).</p>  |
| <p>46 of 5948<br/>Similarity: 18%<br/>Overall Call: (+Ve)</p> 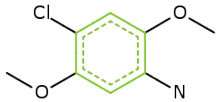 <p>The training set compound has fired 1 Derek alert(s).</p> <p>0 alert(s) for toxicophores related to this hypothesis</p> <p>1 alert(s) for toxicophores not related to this hypothesis<br/>352: Aromatic amine or amide</p> | <p>47 of 5948<br/>Similarity: 18%<br/>Overall Call: (-Ve)</p> 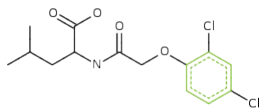 <p>The training set compound has fired 0 Derek alert(s).</p>                                                                                                                                                                 | <p>48 of 5948<br/>Similarity: 18%<br/>Overall Call: (-Ve)</p> 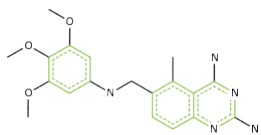 <p>The training set compound has fired 0 Derek alert(s).</p>                                                                                                                                                                 | <p>49 of 5948<br/>Similarity: 18%<br/>Overall Call: (+Ve)</p> 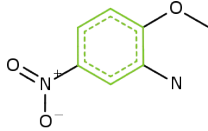 <p>The training set compound has fired 2 Derek alert(s).</p> <p>0 alert(s) for toxicophores related to this hypothesis</p> <p>2 alert(s) for toxicophores not related to this hypothesis<br/>329: Aromatic nitro compound<br/>352: Aromatic amine or amide</p> | <p>50 of 5948<br/>Similarity: 18%<br/>Overall Call: (-Ve)</p> 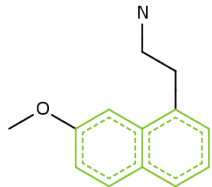 <p>The training set compound has fired 0 Derek alert(s).</p> |

## Hypothesis: H-190

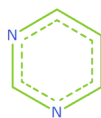

**Sarah Result:** Negative

**Confidence:** 23%

**Examples:** 403

Hypothesis

### Examples:

|                                                                                                                                                                                                              |                                                                                                                                                                                                                                                                                                                                                                                |                                                                                                                                                                                                               |                                                                                                                                                                                                                                                                                                                                                                                       |                                                                                                                                                                                                                                                                                                                                                                                  |
|--------------------------------------------------------------------------------------------------------------------------------------------------------------------------------------------------------------|--------------------------------------------------------------------------------------------------------------------------------------------------------------------------------------------------------------------------------------------------------------------------------------------------------------------------------------------------------------------------------|---------------------------------------------------------------------------------------------------------------------------------------------------------------------------------------------------------------|---------------------------------------------------------------------------------------------------------------------------------------------------------------------------------------------------------------------------------------------------------------------------------------------------------------------------------------------------------------------------------------|----------------------------------------------------------------------------------------------------------------------------------------------------------------------------------------------------------------------------------------------------------------------------------------------------------------------------------------------------------------------------------|
| <p>1 of 403<br/>Similarity: 68%<br/>Overall Call: (-Ve)</p> 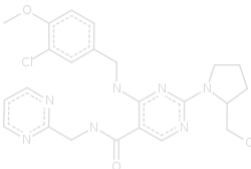 <p>The training set compound has fired 0 Derek alert(s).</p>    | <p>2 of 403<br/>Similarity: 19%<br/>Overall Call: (-Ve)</p> 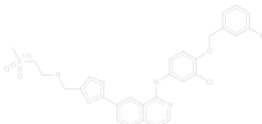 <p>The training set compound has fired 0 Derek alert(s).</p>                                                                                                                                                                     | <p>3 of 403<br/>Similarity: 18%<br/>Overall Call: (-Ve)</p> 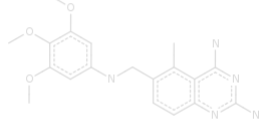 <p>The training set compound has fired 0 Derek alert(s).</p>    | <p>4 of 403<br/>Similarity: 17%<br/>Overall Call: (-Ve)</p> 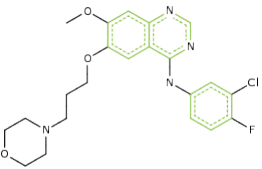 <p>The training set compound has fired 1 Derek alert(s).</p> <p>0 alert(s) for toxicophores related to this hypothesis</p> <p>1 alert(s) for toxicophores not related to this hypothesis<br/>870: Substituted 4-anilinoquinazoline</p> | <p>5 of 403<br/>Similarity: 17%<br/>Overall Call: (+Ve)</p> 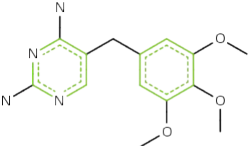 <p>The training set compound has fired 0 Derek alert(s).</p>                                                                                                                                                                     |
| <p>6 of 403<br/>Similarity: 17%<br/>Overall Call: (-Ve)</p> 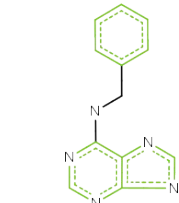 <p>The training set compound has fired 0 Derek alert(s).</p>   | <p>7 of 403<br/>Similarity: 17%<br/>Overall Call: (+Ve)</p> 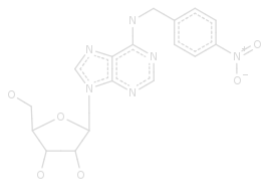 <p>The training set compound has fired 1 Derek alert(s).</p> <p>0 alert(s) for toxicophores related to this hypothesis</p> <p>1 alert(s) for toxicophores not related to this hypothesis<br/>329: Aromatic nitro compound</p>   | <p>8 of 403<br/>Similarity: 16%<br/>Overall Call: (-Ve)</p> 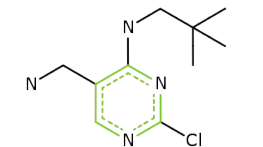 <p>The training set compound has fired 0 Derek alert(s).</p>   | <p>9 of 403<br/>Similarity: 16%<br/>Overall Call: (-Ve)</p> 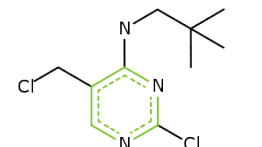 <p>The training set compound has fired 1 Derek alert(s).</p> <p>0 alert(s) for toxicophores related to this hypothesis</p> <p>1 alert(s) for toxicophores not related to this hypothesis<br/>027: Alkylating agent</p>                | <p>10 of 403<br/>Similarity: 16%<br/>Overall Call: (+Ve)</p> 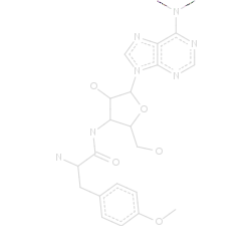 <p>The training set compound has fired 0 Derek alert(s).</p>                                                                                                                                                                   |
| <p>11 of 403<br/>Similarity: 16%<br/>Overall Call: (-Ve)</p> 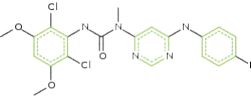 <p>The training set compound has fired 0 Derek alert(s).</p> | <p>12 of 403<br/>Similarity: 15%<br/>Overall Call: (+Ve)</p> 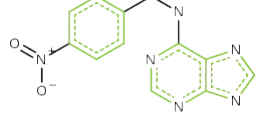 <p>The training set compound has fired 1 Derek alert(s).</p> <p>0 alert(s) for toxicophores related to this hypothesis</p> <p>1 alert(s) for toxicophores not related to this hypothesis<br/>329: Aromatic nitro compound</p> | <p>13 of 403<br/>Similarity: 15%<br/>Overall Call: (-Ve)</p> 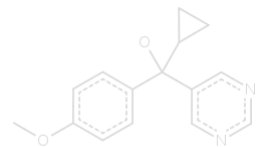 <p>The training set compound has fired 0 Derek alert(s).</p> | <p>14 of 403<br/>Similarity: 15%<br/>Overall Call: (-Ve)</p> 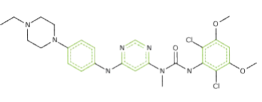 <p>The training set compound has fired 0 Derek alert(s).</p>                                                                                                                                                                        | <p>15 of 403<br/>Similarity: 15%<br/>Overall Call: (+Ve)</p> 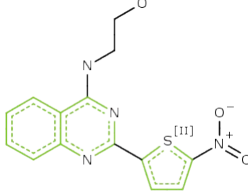 <p>The training set compound has fired 1 Derek alert(s).</p> <p>0 alert(s) for toxicophores related to this hypothesis</p> <p>1 alert(s) for toxicophores not related to this hypothesis<br/>329: Aromatic nitro compound</p> |

|                                                                                                                                                                                                                                                                                                                                                                                                                                                                           |                                                                                                                                                                                                                                                                                                                                                                                                                                                                             |                                                                                                                                                                                                                                                                                                                                                                                                                                                                             |                                                                                                                                                                                                                                                                                                                                                                                                                                                                              |                                                                                                                                                                                                                                                                                                                                                                                                                                                                                 |
|---------------------------------------------------------------------------------------------------------------------------------------------------------------------------------------------------------------------------------------------------------------------------------------------------------------------------------------------------------------------------------------------------------------------------------------------------------------------------|-----------------------------------------------------------------------------------------------------------------------------------------------------------------------------------------------------------------------------------------------------------------------------------------------------------------------------------------------------------------------------------------------------------------------------------------------------------------------------|-----------------------------------------------------------------------------------------------------------------------------------------------------------------------------------------------------------------------------------------------------------------------------------------------------------------------------------------------------------------------------------------------------------------------------------------------------------------------------|------------------------------------------------------------------------------------------------------------------------------------------------------------------------------------------------------------------------------------------------------------------------------------------------------------------------------------------------------------------------------------------------------------------------------------------------------------------------------|---------------------------------------------------------------------------------------------------------------------------------------------------------------------------------------------------------------------------------------------------------------------------------------------------------------------------------------------------------------------------------------------------------------------------------------------------------------------------------|
| <p>16 of 403<br/>Similarity: 14%<br/>Overall Call: (+Ve)</p> 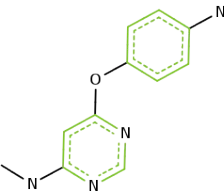 <p>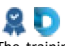 The training set compound has fired 1 Derek alert(s).</p> <p>0 alert(s) for toxicophores related to this hypothesis</p> <p>1 alert(s) for toxicophores not related to this hypothesis<br/>351: Aromatic amine or amide</p>             | <p>17 of 403<br/>Similarity: 14%<br/>Overall Call: (-Ve)</p> 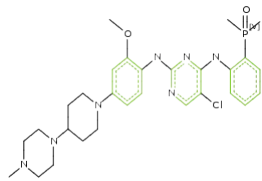 <p>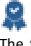 The training set compound has fired 0 Derek alert(s).</p> <p>0 alert(s) for toxicophores related to this hypothesis</p> <p>1 alert(s) for toxicophores not related to this hypothesis<br/>027: Alkylating agent</p>                     | <p>18 of 403<br/>Similarity: 14%<br/>Overall Call: (+Ve)</p> 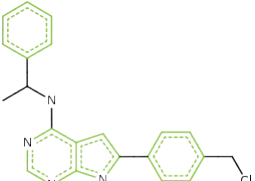 <p>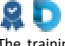 The training set compound has fired 1 Derek alert(s).</p> <p>0 alert(s) for toxicophores related to this hypothesis</p> <p>1 alert(s) for toxicophores not related to this hypothesis<br/>027: Alkylating agent</p>                     | <p>19 of 403<br/>Similarity: 14%<br/>Overall Call: (-Ve)</p> 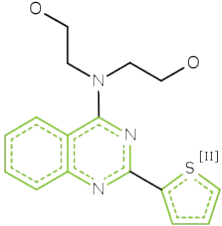 <p>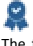 The training set compound has fired 0 Derek alert(s).</p> <p>0 alert(s) for toxicophores related to this hypothesis</p> <p>1 alert(s) for toxicophores not related to this hypothesis<br/>485: 2-Aminopyrimidine</p>                    | <p>20 of 403<br/>Similarity: 14%<br/>Overall Call: (+Ve)</p> 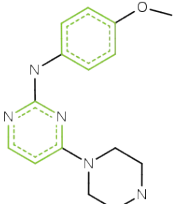 <p>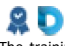 The training set compound has fired 1 Derek alert(s).</p> <p>0 alert(s) for toxicophores related to this hypothesis</p> <p>1 alert(s) for toxicophores not related to this hypothesis<br/>485: 2-Aminopyrimidine</p>                    |
| <p>21 of 403<br/>Similarity: 14%<br/>Overall Call: (-Ve)</p> 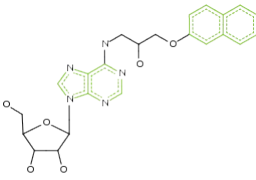 <p> The training set compound has fired 0 Derek alert(s).</p> <p>0 alert(s) for toxicophores related to this hypothesis</p> <p>1 alert(s) for toxicophores not related to this hypothesis<br/>329: Aromatic nitro compound</p>           | <p>22 of 403<br/>Similarity: 14%<br/>Overall Call: (-Ve)</p> 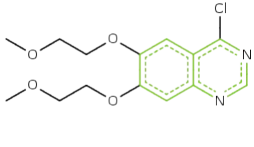 <p>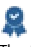 The training set compound has fired 0 Derek alert(s).</p> <p>0 alert(s) for toxicophores related to this hypothesis</p> <p>1 alert(s) for toxicophores not related to this hypothesis<br/>329: Aromatic nitro compound</p>           | <p>23 of 403<br/>Similarity: 14%<br/>Overall Call: (-Ve)</p> 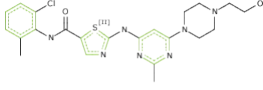 <p>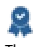 The training set compound has fired 0 Derek alert(s).</p> <p>0 alert(s) for toxicophores related to this hypothesis</p> <p>1 alert(s) for toxicophores not related to this hypothesis<br/>329: Aromatic nitro compound</p>           | <p>24 of 403<br/>Similarity: 13%<br/>Overall Call: (-Ve)</p> 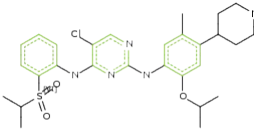 <p>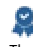 The training set compound has fired 0 Derek alert(s).</p> <p>0 alert(s) for toxicophores related to this hypothesis</p> <p>1 alert(s) for toxicophores not related to this hypothesis<br/>329: Aromatic nitro compound</p>           | <p>25 of 403<br/>Similarity: 13%<br/>Overall Call: (+Ve)</p> 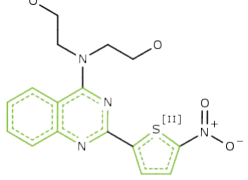 <p>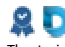 The training set compound has fired 1 Derek alert(s).</p> <p>0 alert(s) for toxicophores related to this hypothesis</p> <p>1 alert(s) for toxicophores not related to this hypothesis<br/>329: Aromatic nitro compound</p>           |
| <p>26 of 403<br/>Similarity: 13%<br/>Overall Call: (-Ve)</p> 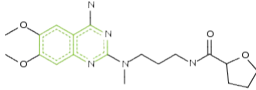 <p> The training set compound has fired 0 Derek alert(s).</p> <p>0 alert(s) for toxicophores related to this hypothesis</p> <p>1 alert(s) for toxicophores not related to this hypothesis<br/>307: N-Methylol compound or precursor</p> | <p>27 of 403<br/>Similarity: 13%<br/>Overall Call: (-Ve)</p> 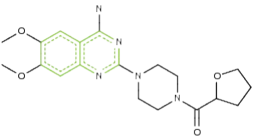 <p>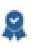 The training set compound has fired 0 Derek alert(s).</p> <p>0 alert(s) for toxicophores related to this hypothesis</p> <p>1 alert(s) for toxicophores not related to this hypothesis<br/>307: N-Methylol compound or precursor</p> | <p>28 of 403<br/>Similarity: 13%<br/>Overall Call: (-Ve)</p> 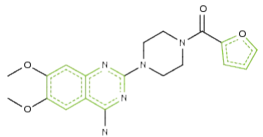 <p>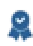 The training set compound has fired 0 Derek alert(s).</p> <p>0 alert(s) for toxicophores related to this hypothesis</p> <p>1 alert(s) for toxicophores not related to this hypothesis<br/>307: N-Methylol compound or precursor</p> | <p>29 of 403<br/>Similarity: 13%<br/>Overall Call: (-Ve)</p> 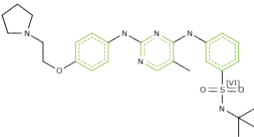 <p>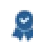 The training set compound has fired 0 Derek alert(s).</p> <p>0 alert(s) for toxicophores related to this hypothesis</p> <p>1 alert(s) for toxicophores not related to this hypothesis<br/>307: N-Methylol compound or precursor</p> | <p>30 of 403<br/>Similarity: 12%<br/>Overall Call: (-Ve)</p> 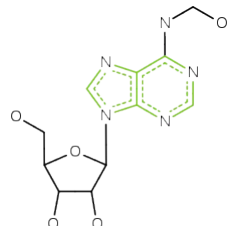 <p>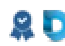 The training set compound has fired 1 Derek alert(s).</p> <p>0 alert(s) for toxicophores related to this hypothesis</p> <p>1 alert(s) for toxicophores not related to this hypothesis<br/>307: N-Methylol compound or precursor</p> |

|                                                                                                                                                                                                                                                                                                 |                                                                                                                                                                                                                                                                                                   |                                                                                                                                                                                                                                                                                                   |                                                                                                                                                                                                                                                                                                    |                                                                                                                                                                                                                                                                                                       |
|-------------------------------------------------------------------------------------------------------------------------------------------------------------------------------------------------------------------------------------------------------------------------------------------------|---------------------------------------------------------------------------------------------------------------------------------------------------------------------------------------------------------------------------------------------------------------------------------------------------|---------------------------------------------------------------------------------------------------------------------------------------------------------------------------------------------------------------------------------------------------------------------------------------------------|----------------------------------------------------------------------------------------------------------------------------------------------------------------------------------------------------------------------------------------------------------------------------------------------------|-------------------------------------------------------------------------------------------------------------------------------------------------------------------------------------------------------------------------------------------------------------------------------------------------------|
| <p>31 of 403<br/>Similarity: 12%<br/>Overall Call: (-Ve)</p> 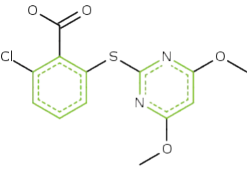 <p>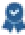 The training set compound has fired 0 Derek alert(s).</p>     | <p>32 of 403<br/>Similarity: 12%<br/>Overall Call: (-Ve)</p> 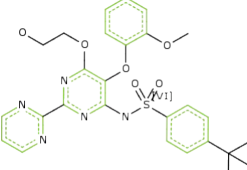 <p>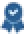 The training set compound has fired 0 Derek alert(s).</p>     | <p>33 of 403<br/>Similarity: 12%<br/>Overall Call: (-Ve)</p> 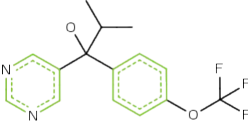 <p> The training set compound has fired 0 Derek alert(s).</p>     | <p>34 of 403<br/>Similarity: 12%<br/>Overall Call: (-Ve)</p> 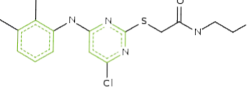 <p>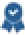 The training set compound has fired 0 Derek alert(s).</p>     | <p>35 of 403<br/>Similarity: 12%<br/>Overall Call: (-Ve)</p> 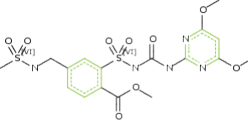 <p> The training set compound has fired 0 Derek alert(s).</p>     |
| <p>36 of 403<br/>Similarity: 12%<br/>Overall Call: (-Ve)</p> 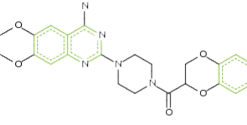 <p>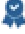 The training set compound has fired 0 Derek alert(s).</p>   | <p>37 of 403<br/>Similarity: 12%<br/>Overall Call: (-Ve)</p> 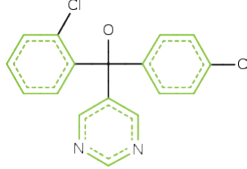 <p>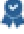 The training set compound has fired 0 Derek alert(s).</p>   | <p>38 of 403<br/>Similarity: 12%<br/>Overall Call: (-Ve)</p> 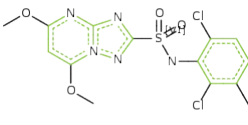 <p> The training set compound has fired 0 Derek alert(s).</p>   | <p>39 of 403<br/>Similarity: 12%<br/>Overall Call: (-Ve)</p> 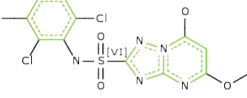 <p>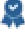 The training set compound has fired 0 Derek alert(s).</p>   | <p>40 of 403<br/>Similarity: 11%<br/>Overall Call: (-Ve)</p> 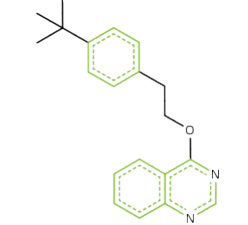 <p> The training set compound has fired 0 Derek alert(s).</p>  |
| <p>41 of 403<br/>Similarity: 11%<br/>Overall Call: (-Ve)</p> 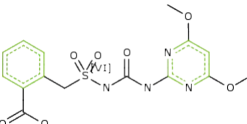 <p>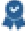 The training set compound has fired 0 Derek alert(s).</p> | <p>42 of 403<br/>Similarity: 11%<br/>Overall Call: (-Ve)</p> 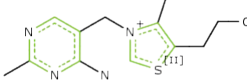 <p>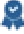 The training set compound has fired 0 Derek alert(s).</p> | <p>43 of 403<br/>Similarity: 11%<br/>Overall Call: (-Ve)</p> 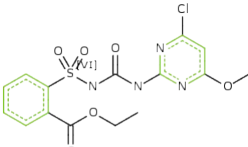 <p> The training set compound has fired 0 Derek alert(s).</p> | <p>44 of 403<br/>Similarity: 11%<br/>Overall Call: (-Ve)</p> 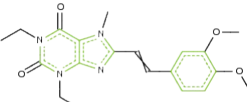 <p>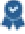 The training set compound has fired 0 Derek alert(s).</p> | <p>45 of 403<br/>Similarity: 11%<br/>Overall Call: (-Ve)</p> 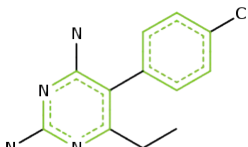 <p> The training set compound has fired 0 Derek alert(s).</p> |

|                                                                                                                                                                                                                                                                                              |                                                                                                                                                                                                                                                                                               |                                                                                                                                                                                                                                                                                               |                                                                                                                                                                                                                                                                                                |                                                                                                                                                                                                                                                                                                   |
|----------------------------------------------------------------------------------------------------------------------------------------------------------------------------------------------------------------------------------------------------------------------------------------------|-----------------------------------------------------------------------------------------------------------------------------------------------------------------------------------------------------------------------------------------------------------------------------------------------|-----------------------------------------------------------------------------------------------------------------------------------------------------------------------------------------------------------------------------------------------------------------------------------------------|------------------------------------------------------------------------------------------------------------------------------------------------------------------------------------------------------------------------------------------------------------------------------------------------|---------------------------------------------------------------------------------------------------------------------------------------------------------------------------------------------------------------------------------------------------------------------------------------------------|
| <p>46 of 403<br/>Similarity: 11%<br/>Overall Call: (-Ve)</p> 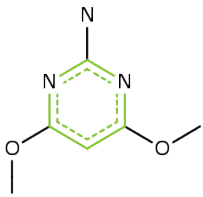 <p>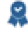 The training set compound has fired 0 Derek alert(s).</p> | <p>47 of 403<br/>Similarity: 11%<br/>Overall Call: (-Ve)</p> 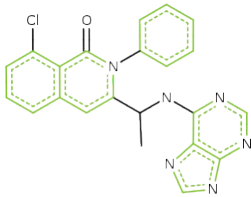 <p>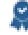 The training set compound has fired 0 Derek alert(s).</p> | <p>48 of 403<br/>Similarity: 11%<br/>Overall Call: (-Ve)</p> 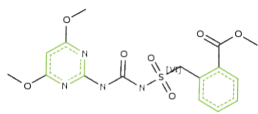 <p>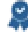 The training set compound has fired 0 Derek alert(s).</p> | <p>49 of 403<br/>Similarity: 11%<br/>Overall Call: (-Ve)</p> 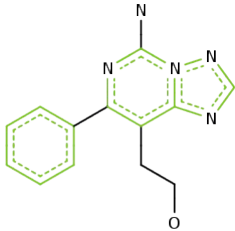 <p>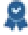 The training set compound has fired 0 Derek alert(s).</p> | <p>50 of 403<br/>Similarity: 11%<br/>Overall Call: (-Ve)</p> 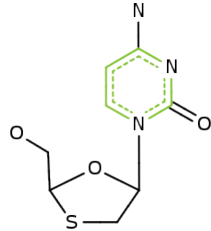 <p>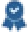 The training set compound has fired 0 Derek alert(s).</p> |
|----------------------------------------------------------------------------------------------------------------------------------------------------------------------------------------------------------------------------------------------------------------------------------------------|-----------------------------------------------------------------------------------------------------------------------------------------------------------------------------------------------------------------------------------------------------------------------------------------------|-----------------------------------------------------------------------------------------------------------------------------------------------------------------------------------------------------------------------------------------------------------------------------------------------|------------------------------------------------------------------------------------------------------------------------------------------------------------------------------------------------------------------------------------------------------------------------------------------------|---------------------------------------------------------------------------------------------------------------------------------------------------------------------------------------------------------------------------------------------------------------------------------------------------|

---

## Glossary

---

### Derek Prediction Outcomes

**Certain**

There is proof that the proposition is true.

**Probable**

There is at least one strong argument that the proposition is true and there are no arguments against it.

**Plausible**

The weight of evidence supports the proposition.

**Equivocal**

There is an equal weight of evidence for and against the proposition.

**Doubted**

The weight of evidence opposes the proposition.

**Improbable**

There is at least one strong argument that the proposition is false and there are no arguments that it is true.

**Impossible**

There is proof that the proposition is false.

**Open**

There is no evidence that supports or opposes the proposition.

**Contradicted**

There is proof that the proposition is both true and false.

**Inactive, no misclassified or unclassified features**

The query structure does not match any structural alerts or examples in Derek which show activity in a bacterial reverse mutation assay (Ames test). Additionally, the query structure does not contain any unclassified or misclassified features.

**Inactive, contains misclassified features**

Features in the molecule are found in non-alerting mutagens in the Lhasa reference set. The prediction remains negative and the misclassified features are highlighted to enable the negative prediction to be verified by expert assessment.

**Inactive, contains unclassified features**

Some features in the molecule have not been found in the Lhasa reference set. The prediction remains negative and the unclassified features are highlighted to enable the negative prediction to be verified by expert assessment.

**Inactive, contains misclassified and unclassified features**

The query structure contains features that are misclassified and features that are unclassified. These are highlighted on the structure.

**CAS Registry Numbers® (CAS RN®)**

CAS Registry Numbers® are the intellectual property of the American Chemical Society; and are used by Lhasa Limited with the express permission of CAS. CAS Registry Numbers® have not been verified by CAS and may be inaccurate. Expert data scientists at Lhasa Limited cross

reference CAS Registry Numbers® against multiple sources to achieve a high level of accuracy.

## Sarah Prediction Outcomes

### Positive

The query structure is predicted to be positive in a bacterial reverse mutation assay (Ames test).

### Negative

The query structure is predicted to be negative in a bacterial reverse mutation assay (Ames test).

### Equivocal

A strong argument cannot be made based on the training set compounds and any hypotheses generated for the query compound for either activity or inactivity in a bacterial reverse mutation assay (Ames test). In the absence of a strong overall signal, an equivocal call has been made.

### Out of Domain

At least one atom present in a fragment of the query compound is not represented by any of the fragments in the training set used to build the model. As a result, the compound is outside the training dataset domain and an overall prediction is not possible.

### Confidence

The overall confidence for a prediction is determined from the confidence of the individual hypotheses activated by the structure. These are, in turn, based on the signal and the Tanimoto similarity of the nearest neighbours to the query structure used to build the hypothesis. In the absence of any hypotheses being activated by the query compound, the signal and Tanimoto similarity of the nearest neighbours from the entire training set are used to generate the overall confidence.

### CAS Registry Numbers® (CAS RN®)

CAS Registry Numbers® are the intellectual property of the American Chemical Society; and are used by Lhasa Limited with the express permission of CAS. CAS Registry Numbers® have not been verified by CAS and may be inaccurate. Expert data scientists at Lhasa Limited cross reference CAS Registry Numbers® against multiple sources to achieve a high level of accuracy.

## ICH M7 Sarah Example Icons

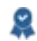

Example compound is Lhasa certified

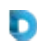

Derek alert has been fired for the example compound

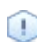

All Derek alerts fired for the example compound were for toxicophores not related to the hypothesis.

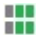 Experimental data for the most sensitive strains relating to the hypothesis is missing for the example compound.

---

## Prediction Summary - Impurity-F.cdx

---

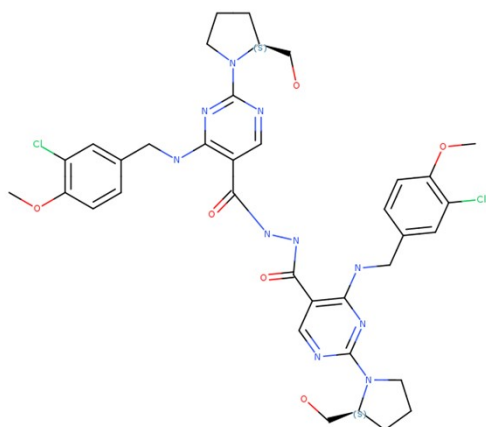

**Derek:** 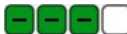 Inactive  
**Sarah:** 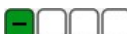 Negative

Smiles:

C1(=C(C=CC(=C1)CNC2=C(C=NC(=N2)N3[C@@H](CCC3)CO)C(=O)NNC(C5=C(NCC=4C=CC(=C(C=4)Cl)OC)N=C(N=C5)N6[C@@H](CCC6)CO)=O)OC)Cl

|                    |          |
|--------------------|----------|
| <b>Average Mol</b> | 781.69   |
| <b>Mass:</b>       |          |
| <b>Exact Mol</b>   | 780.2666 |
| <b>Mass:</b>       |          |
| <b>Log Kp:</b>     | -3.68    |
| <b>Log P:</b>      | 5.37     |

---

## Expert Review Summary

---

**In Silico Overall Conclusion: Negative (Calculated Call)**

**ICH M7 Cohort of Concern: No**

Review status: Review not started

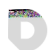

## Prediction Detail – Derek Nexus

| Derek Knowledge Base | Version | Last Modified Date  | Certified by                           |
|----------------------|---------|---------------------|----------------------------------------|
| Derek KB 2022 2.0    | 2.0     | 13/07/2022 18:02:45 | Lhasa Limited, Leeds,<br>Yorkshire, UK |
|                      |         | Perceive Mixtures   | Perceive Tautomers                     |
|                      |         | No                  | No                                     |

### ***Mutagenicity in vitro* in bacterium is INACTIVE (from KB: Derek KB 2022 2.0)**

The parameters that have influenced your prediction are: substructures in the input structure, which have the potential to cause mutagenicity; your selected species, which is bacterium.

#### **Overview**

No misclassified or unclassified features

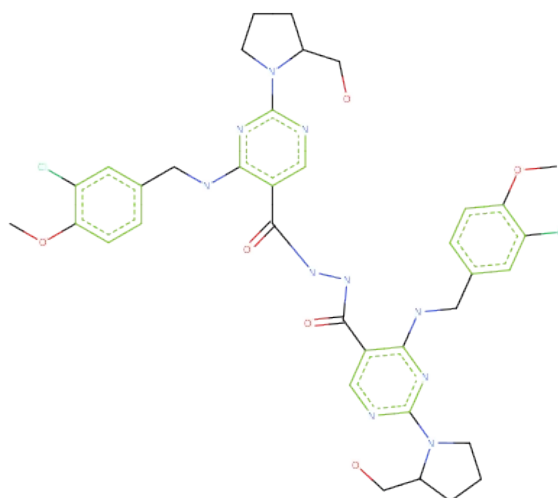

#### **Details**

The query structure does not match any structural alerts or examples for (bacterial in vitro) mutagenicity in Derek. Additionally, the query structure does not contain any unclassified or misclassified features and is consequently predicted to be inactive in the bacterial in vitro (Ames) mutagenicity test.

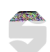

## Prediction Detail – Sarah Nexus

| Sarah Model Name     | Version | Certified |
|----------------------|---------|-----------|
| Sarah Model - 2022.2 | 1.10    | Yes       |

The compound is predicted to be negative with 21% confidence for the 'Mutagenicity in vitro' endpoint in the model: 'Sarah Model - 2022.2'. Supporting hypotheses containing similar examples from the training set have been found.

### Hypotheses

| Structure                                                                           | ID    | Description | Result   | Confidence | Examples |
|-------------------------------------------------------------------------------------|-------|-------------|----------|------------|----------|
| 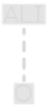   | H-309 | Hypothesis  | Negative | 24%        | 1672     |
| 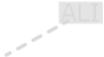 | H-294 | Hypothesis  | Negative | 16%        | 5948     |
| 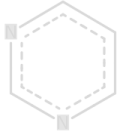 | H-190 | Hypothesis  | Negative | 21%        | 403      |

### Hypothesis: H-309

|                                                                                     |                                                                                                |
|-------------------------------------------------------------------------------------|------------------------------------------------------------------------------------------------|
| 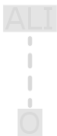 | <b>Sarah Result:</b> Negative<br><b>Confidence:</b> 24%<br><b>Examples:</b> 1672<br>Hypothesis |
|-------------------------------------------------------------------------------------|------------------------------------------------------------------------------------------------|

### Examples:

|                                                                                                                                                                                                                                                                                                                                                                                                                                                                    |                                                                                                                                                                                                                                                                                                                                                                                                                                                                   |                                                                                                                                                                                                                                                                                                                                                                                                                                                                |                                                                                                                                                                                                                                                                                                                                                                                                                                                                   |                                                                                                                                                                                                                                                                                                                                                                                                                                                                         |
|--------------------------------------------------------------------------------------------------------------------------------------------------------------------------------------------------------------------------------------------------------------------------------------------------------------------------------------------------------------------------------------------------------------------------------------------------------------------|-------------------------------------------------------------------------------------------------------------------------------------------------------------------------------------------------------------------------------------------------------------------------------------------------------------------------------------------------------------------------------------------------------------------------------------------------------------------|----------------------------------------------------------------------------------------------------------------------------------------------------------------------------------------------------------------------------------------------------------------------------------------------------------------------------------------------------------------------------------------------------------------------------------------------------------------|-------------------------------------------------------------------------------------------------------------------------------------------------------------------------------------------------------------------------------------------------------------------------------------------------------------------------------------------------------------------------------------------------------------------------------------------------------------------|-------------------------------------------------------------------------------------------------------------------------------------------------------------------------------------------------------------------------------------------------------------------------------------------------------------------------------------------------------------------------------------------------------------------------------------------------------------------------|
| <p>1 of 1672<br/>Similarity: 66%<br/>Overall Call: (-Ve)</p> 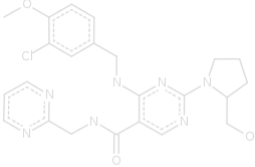 <p>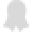 The training set compound has fired 0 Derek alert(s).</p> <p>0 alert(s) for toxicophores related to this hypothesis</p> <p>1 alert(s) for toxicophores not related to this hypothesis<br/>352: Aromatic amine or amide</p>       | <p>2 of 1672<br/>Similarity: 22%<br/>Overall Call: (-Ve)</p> 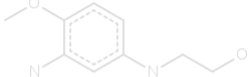 <p>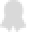 The training set compound has fired 1 Derek alert(s).</p> <p>0 alert(s) for toxicophores related to this hypothesis</p> <p>1 alert(s) for toxicophores not related to this hypothesis<br/>352: Aromatic amine or amide</p>    | <p>3 of 1672<br/>Similarity: 22%<br/>Overall Call: (-Ve)</p> 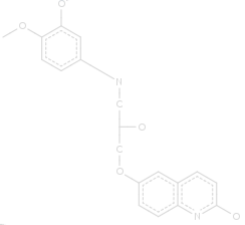 <p>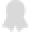 The training set compound has fired 0 Derek alert(s).</p>                                                                                                                                                                  | <p>4 of 1672<br/>Similarity: 21%<br/>Overall Call: (-Ve)</p> 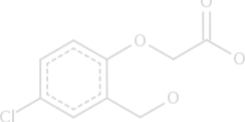 <p>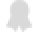 The training set compound has fired 0 Derek alert(s).</p>                                                                                                                                                                    | <p>5 of 1672<br/>Similarity: 19%<br/>Overall Call: (-Ve)</p> 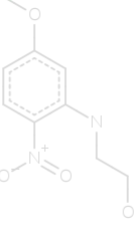 <p>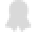 The training set compound has fired 0 Derek alert(s).</p>                                                                                                                                                                       |
| <p>6 of 1672<br/>Similarity: 19%<br/>Overall Call: (+Ve)</p> 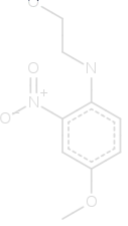 <p>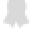 The training set compound has fired 0 Derek alert(s).</p>                                                                                                                                                                    | <p>7 of 1672<br/>Similarity: 19%<br/>Overall Call: (+Ve)</p> 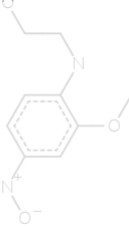 <p>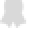 The training set compound has fired 1 Derek alert(s).</p> <p>0 alert(s) for toxicophores related to this hypothesis</p> <p>1 alert(s) for toxicophores not related to this hypothesis<br/>329: Aromatic nitro compound</p> | <p>8 of 1672<br/>Similarity: 18%<br/>Overall Call: (+Ve)</p> 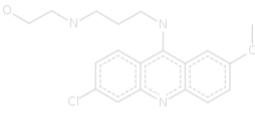 <p>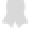 The training set compound has fired 1 Derek alert(s).</p> <p>0 alert(s) for toxicophores related to this hypothesis</p> <p>1 alert(s) for toxicophores not related to this hypothesis<br/>365: Acridine or analogue</p> | <p>9 of 1672<br/>Similarity: 18%<br/>Overall Call: (-Ve)</p> 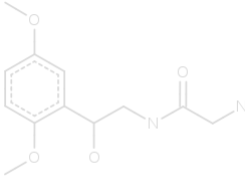 <p>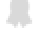 The training set compound has fired 0 Derek alert(s).</p>                                                                                                                                                                 | <p>10 of 1672<br/>Similarity: 18%<br/>Overall Call: (-Ve)</p> 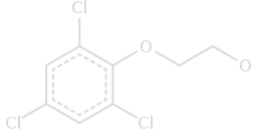 <p>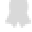 The training set compound has fired 0 Derek alert(s).</p>                                                                                                                                                                   |
| <p>11 of 1672<br/>Similarity: 18%<br/>Overall Call: (-Ve)</p> 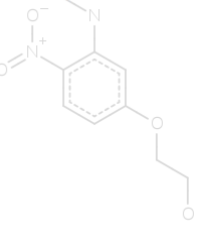 <p>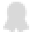 The training set compound has fired 1 Derek alert(s).</p> <p>0 alert(s) for toxicophores related to this hypothesis</p> <p>1 alert(s) for toxicophores not related to this hypothesis<br/>352: Aromatic amine or amide</p> | <p>12 of 1672<br/>Similarity: 17%<br/>Overall Call: (-Ve)</p> 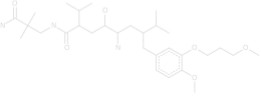 <p>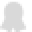 The training set compound has fired 0 Derek alert(s).</p>                                                                                                                                                                | <p>13 of 1672<br/>Similarity: 17%<br/>Overall Call: (-Ve)</p> 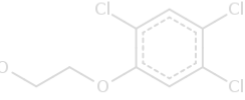 <p>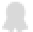 The training set compound has fired 0 Derek alert(s).</p>                                                                                                                                                             | <p>14 of 1672<br/>Similarity: 17%<br/>Overall Call: (+Ve)</p> 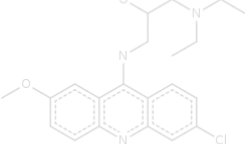 <p>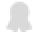 The training set compound has fired 1 Derek alert(s).</p> <p>0 alert(s) for toxicophores related to this hypothesis</p> <p>1 alert(s) for toxicophores not related to this hypothesis<br/>365: Acridine or analogue</p> | <p>15 of 1672<br/>Similarity: 17%<br/>Overall Call: (-Ve)</p> 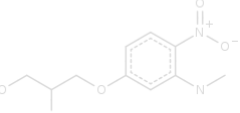 <p>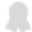 The training set compound has fired 1 Derek alert(s).</p> <p>0 alert(s) for toxicophores related to this hypothesis</p> <p>1 alert(s) for toxicophores not related to this hypothesis<br/>352: Aromatic amine or amide</p> |

|                                                                                                                                                                                                                                                                                                  |                                                                                                                                                                                                                                                                                                                                                                                                                                                                 |                                                                                                                                                                                                                                                                                                    |                                                                                                                                                                                                                                                                                                     |                                                                                                                                                                                                                                                                                                                                                                                                                                                                        |
|--------------------------------------------------------------------------------------------------------------------------------------------------------------------------------------------------------------------------------------------------------------------------------------------------|-----------------------------------------------------------------------------------------------------------------------------------------------------------------------------------------------------------------------------------------------------------------------------------------------------------------------------------------------------------------------------------------------------------------------------------------------------------------|----------------------------------------------------------------------------------------------------------------------------------------------------------------------------------------------------------------------------------------------------------------------------------------------------|-----------------------------------------------------------------------------------------------------------------------------------------------------------------------------------------------------------------------------------------------------------------------------------------------------|------------------------------------------------------------------------------------------------------------------------------------------------------------------------------------------------------------------------------------------------------------------------------------------------------------------------------------------------------------------------------------------------------------------------------------------------------------------------|
| <p>16 of 1672<br/>Similarity: 17%<br/>Overall Call: (+Ve)</p> 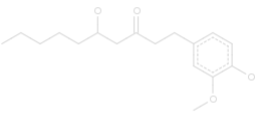 <p>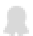 The training set compound has fired 0 Derek alert(s).</p>     | <p>17 of 1672<br/>Similarity: 16%<br/>Overall Call: (+Ve)</p> 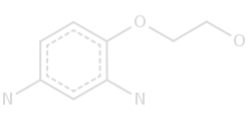 <p>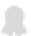 The training set compound has fired 1 Derek alert(s).</p> <p>0 alert(s) for toxicophores related to this hypothesis</p> <p>1 alert(s) for toxicophores not related to this hypothesis<br/>352: Aromatic amine or amide</p> | <p>18 of 1672<br/>Similarity: 16%<br/>Overall Call: (-Ve)</p> 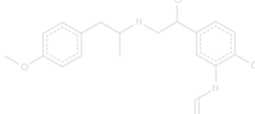 <p>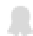 The training set compound has fired 0 Derek alert(s).</p>     | <p>19 of 1672<br/>Similarity: 16%<br/>Overall Call: (-Ve)</p> 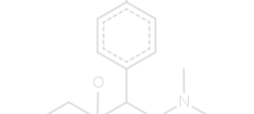 <p>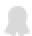 The training set compound has fired 0 Derek alert(s).</p>     | <p>20 of 1672<br/>Similarity: 16%<br/>Overall Call: (+Ve)</p> 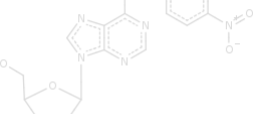 <p>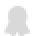 The training set compound has fired 1 Derek alert(s).</p> <p>0 alert(s) for toxicophores related to this hypothesis</p> <p>1 alert(s) for toxicophores not related to this hypothesis<br/>329: Aromatic nitro compound</p>    |
| <p>21 of 1672<br/>Similarity: 16%<br/>Overall Call: (-Ve)</p> 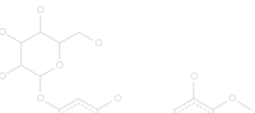 <p>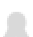 The training set compound has fired 0 Derek alert(s).</p>  | <p>22 of 1672<br/>Similarity: 16%<br/>Overall Call: (-Ve)</p> 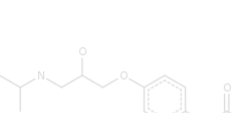 <p>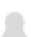 The training set compound has fired 0 Derek alert(s).</p>                                                                                                                                                               | <p>23 of 1672<br/>Similarity: 16%<br/>Overall Call: (-Ve)</p> 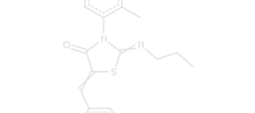 <p>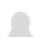 The training set compound has fired 0 Derek alert(s).</p>  | <p>24 of 1672<br/>Similarity: 16%<br/>Overall Call: (+Ve)</p> 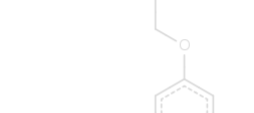 <p>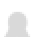 The training set compound has fired 0 Derek alert(s).</p>  | <p>25 of 1672<br/>Similarity: 16%<br/>Overall Call: (+Ve)</p> 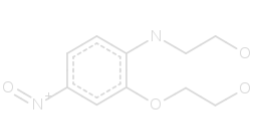 <p>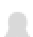 The training set compound has fired 1 Derek alert(s).</p> <p>0 alert(s) for toxicophores related to this hypothesis</p> <p>1 alert(s) for toxicophores not related to this hypothesis<br/>329: Aromatic nitro compound</p> |
| <p>26 of 1672<br/>Similarity: 16%<br/>Overall Call: (+Ve)</p> 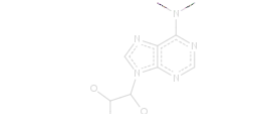 <p>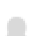 The training set compound has fired 0 Derek alert(s).</p> | <p>27 of 1672<br/>Similarity: 16%<br/>Overall Call: (+Ve)</p> 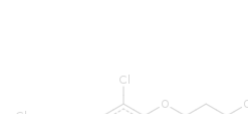 <p>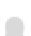 The training set compound has fired 0 Derek alert(s).</p>                                                                                                                                                              | <p>28 of 1672<br/>Similarity: 16%<br/>Overall Call: (-Ve)</p> 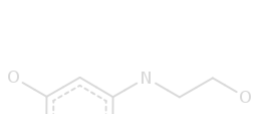 <p>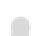 The training set compound has fired 0 Derek alert(s).</p> | <p>29 of 1672<br/>Similarity: 16%<br/>Overall Call: (-Ve)</p> 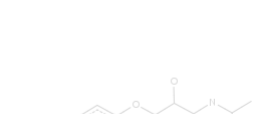 <p>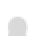 The training set compound has fired 0 Derek alert(s).</p> | <p>30 of 1672<br/>Similarity: 16%<br/>Overall Call: (+Ve)</p> 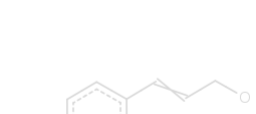 <p>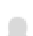 The training set compound has fired 0 Derek alert(s).</p>                                                                                                                                                                 |

|                                                                                                                                                                                                                                                                                                  |                                                                                                                                                                                                                                                                                                    |                                                                                                                                                                                                                                                                                                    |                                                                                                                                                                                                                                                                                                     |                                                                                                                                                                                                                                                                                                                                                                                                                                                     |
|--------------------------------------------------------------------------------------------------------------------------------------------------------------------------------------------------------------------------------------------------------------------------------------------------|----------------------------------------------------------------------------------------------------------------------------------------------------------------------------------------------------------------------------------------------------------------------------------------------------|----------------------------------------------------------------------------------------------------------------------------------------------------------------------------------------------------------------------------------------------------------------------------------------------------|-----------------------------------------------------------------------------------------------------------------------------------------------------------------------------------------------------------------------------------------------------------------------------------------------------|-----------------------------------------------------------------------------------------------------------------------------------------------------------------------------------------------------------------------------------------------------------------------------------------------------------------------------------------------------------------------------------------------------------------------------------------------------|
| <p>31 of 1672<br/>Similarity: 16%<br/>Overall Call: (-Ve)</p> 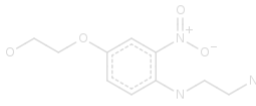 <p>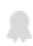 The training set compound has fired 0 Derek alert(s).</p>     | <p>32 of 1672<br/>Similarity: 15%<br/>Overall Call: (-Ve)</p> 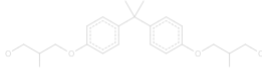 <p>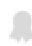 The training set compound has fired 0 Derek alert(s).</p>     | <p>33 of 1672<br/>Similarity: 15%<br/>Overall Call: (+Ve)</p> 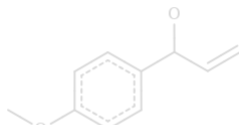 <p>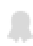 The training set compound has fired 0 Derek alert(s).</p>     | <p>34 of 1672<br/>Similarity: 15%<br/>Overall Call: (-Ve)</p> 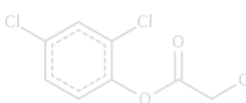 <p>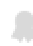 The training set compound has fired 0 Derek alert(s).</p>     | <p>35 of 1672<br/>Similarity: 15%<br/>Overall Call: (+Ve)</p> 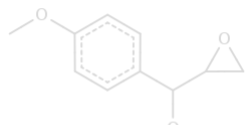 <p>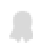 The training set compound has fired 1 Derek alert(s).</p> <p>0 alert(s) for toxicophores related to this hypothesis</p> <p>1 alert(s) for toxicophores not related to this hypothesis<br/>019: Epoxide</p> |
| <p>36 of 1672<br/>Similarity: 15%<br/>Overall Call: (-Ve)</p> 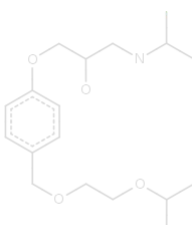 <p>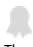 The training set compound has fired 0 Derek alert(s).</p> | <p>37 of 1672<br/>Similarity: 15%<br/>Overall Call: (-Ve)</p> 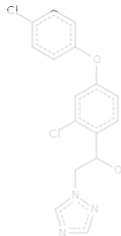 <p>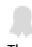 The training set compound has fired 0 Derek alert(s).</p>  | <p>38 of 1672<br/>Similarity: 15%<br/>Overall Call: (+Ve)</p> 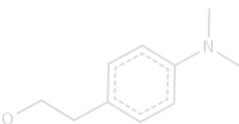 <p>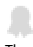 The training set compound has fired 0 Derek alert(s).</p>  | <p>39 of 1672<br/>Similarity: 15%<br/>Overall Call: (-Ve)</p> 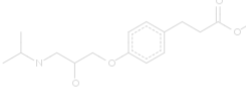 <p>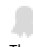 The training set compound has fired 0 Derek alert(s).</p>  | <p>40 of 1672<br/>Similarity: 15%<br/>Overall Call: (-Ve)</p> 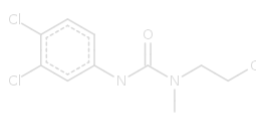 <p>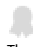 The training set compound has fired 0 Derek alert(s).</p>                                                                                                                                               |
| <p>41 of 1672<br/>Similarity: 15%<br/>Overall Call: (+Ve)</p> 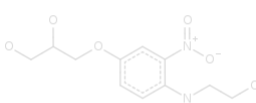 <p>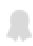 The training set compound has fired 0 Derek alert(s).</p> | <p>42 of 1672<br/>Similarity: 15%<br/>Overall Call: (-Ve)</p> 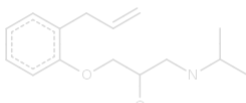 <p>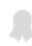 The training set compound has fired 0 Derek alert(s).</p> | <p>43 of 1672<br/>Similarity: 15%<br/>Overall Call: (-Ve)</p> 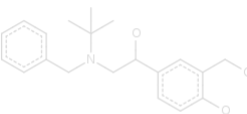 <p>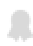 The training set compound has fired 0 Derek alert(s).</p> | <p>44 of 1672<br/>Similarity: 15%<br/>Overall Call: (-Ve)</p> 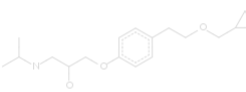 <p>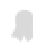 The training set compound has fired 0 Derek alert(s).</p> | <p>45 of 1672<br/>Similarity: 15%<br/>Overall Call: (-Ve)</p> 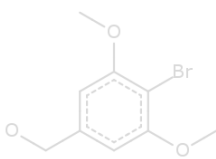 <p>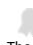 The training set compound has fired 0 Derek alert(s).</p>                                                                                                                                              |

|                                                                                                                                                                                                             |                                                                                                                                                                                                              |                                                                                                                                                                                                                                                                                                                                                                        |                                                                                                                                                                                                               |                                                                                                                                                                                                                |
|-------------------------------------------------------------------------------------------------------------------------------------------------------------------------------------------------------------|--------------------------------------------------------------------------------------------------------------------------------------------------------------------------------------------------------------|------------------------------------------------------------------------------------------------------------------------------------------------------------------------------------------------------------------------------------------------------------------------------------------------------------------------------------------------------------------------|---------------------------------------------------------------------------------------------------------------------------------------------------------------------------------------------------------------|----------------------------------------------------------------------------------------------------------------------------------------------------------------------------------------------------------------|
| <p>46 of 1672<br/>Similarity: 15%<br/>Overall Call: (-Ve)</p> 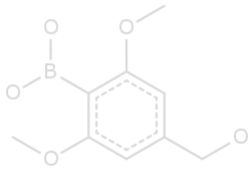 <p>The training set compound has fired 0 Derek alert(s).</p> | <p>47 of 1672<br/>Similarity: 15%<br/>Overall Call: (-Ve)</p> 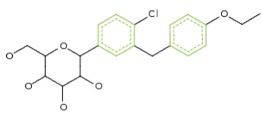 <p>The training set compound has fired 0 Derek alert(s).</p> | <p>48 of 1672<br/>Similarity: 15%<br/>Overall Call: (+Ve)</p> 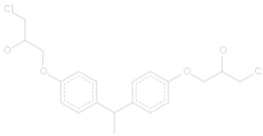 <p>The training set compound has fired 1 Derek alert(s).</p> <p>0 alert(s) for toxicophores related to this hypothesis</p> <p>1 alert(s) for toxicophores not related to this hypothesis<br/>027: Alkylating agent</p> | <p>49 of 1672<br/>Similarity: 15%<br/>Overall Call: (-Ve)</p> 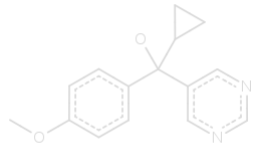 <p>The training set compound has fired 0 Derek alert(s).</p> | <p>50 of 1672<br/>Similarity: 15%<br/>Overall Call: (+Ve)</p> 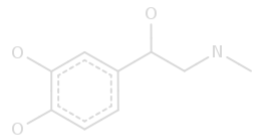 <p>The training set compound has fired 0 Derek alert(s).</p> |
|-------------------------------------------------------------------------------------------------------------------------------------------------------------------------------------------------------------|--------------------------------------------------------------------------------------------------------------------------------------------------------------------------------------------------------------|------------------------------------------------------------------------------------------------------------------------------------------------------------------------------------------------------------------------------------------------------------------------------------------------------------------------------------------------------------------------|---------------------------------------------------------------------------------------------------------------------------------------------------------------------------------------------------------------|----------------------------------------------------------------------------------------------------------------------------------------------------------------------------------------------------------------|

## Hypothesis: H-294

|                                                                                     |                                                                                                                   |
|-------------------------------------------------------------------------------------|-------------------------------------------------------------------------------------------------------------------|
| 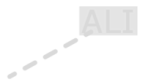 | <p><b>Sarah Result:</b> Negative</p> <p><b>Confidence:</b> 16%</p> <p><b>Examples:</b> 5948</p> <p>Hypothesis</p> |
|-------------------------------------------------------------------------------------|-------------------------------------------------------------------------------------------------------------------|

## Examples:

|                                                                                                                                                                                                              |                                                                                                                                                                                                               |                                                                                                                                                                                                                                                                                                                                                                |                                                                                                                                                                                                                |                                                                                                                                                                                                                                                                                                                                                                           |
|--------------------------------------------------------------------------------------------------------------------------------------------------------------------------------------------------------------|---------------------------------------------------------------------------------------------------------------------------------------------------------------------------------------------------------------|----------------------------------------------------------------------------------------------------------------------------------------------------------------------------------------------------------------------------------------------------------------------------------------------------------------------------------------------------------------|----------------------------------------------------------------------------------------------------------------------------------------------------------------------------------------------------------------|---------------------------------------------------------------------------------------------------------------------------------------------------------------------------------------------------------------------------------------------------------------------------------------------------------------------------------------------------------------------------|
| <p>1 of 5948<br/>Similarity: 66%<br/>Overall Call: (-Ve)</p> 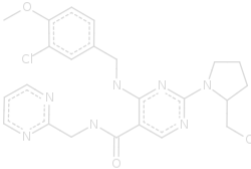 <p>The training set compound has fired 0 Derek alert(s).</p> | <p>2 of 5948<br/>Similarity: 26%<br/>Overall Call: (-Ve)</p> 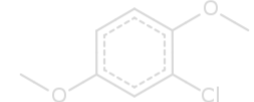 <p>The training set compound has fired 0 Derek alert(s).</p> | <p>3 of 5948<br/>Similarity: 23%<br/>Overall Call: (+Ve)</p> 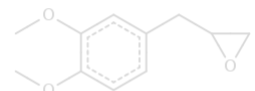 <p>The training set compound has fired 1 Derek alert(s).</p> <p>0 alert(s) for toxicophores related to this hypothesis</p> <p>1 alert(s) for toxicophores not related to this hypothesis<br/>019: Epoxide</p> | <p>4 of 5948<br/>Similarity: 23%<br/>Overall Call: (-Ve)</p> 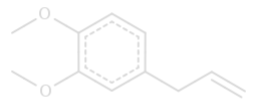 <p>The training set compound has fired 0 Derek alert(s).</p> | <p>5 of 5948<br/>Similarity: 23%<br/>Overall Call: (+Ve)</p> 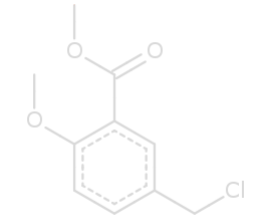 <p>The training set compound has fired 1 Derek alert(s).</p> <p>0 alert(s) for toxicophores related to this hypothesis</p> <p>1 alert(s) for toxicophores not related to this hypothesis<br/>027: Alkylating agent</p> |
|--------------------------------------------------------------------------------------------------------------------------------------------------------------------------------------------------------------|---------------------------------------------------------------------------------------------------------------------------------------------------------------------------------------------------------------|----------------------------------------------------------------------------------------------------------------------------------------------------------------------------------------------------------------------------------------------------------------------------------------------------------------------------------------------------------------|----------------------------------------------------------------------------------------------------------------------------------------------------------------------------------------------------------------|---------------------------------------------------------------------------------------------------------------------------------------------------------------------------------------------------------------------------------------------------------------------------------------------------------------------------------------------------------------------------|



|                                                                                                                                                                                                                                                                                                  |                                                                                                                                                                                                                                                                                                    |                                                                                                                                                                                                                                                                                                                                                                                                                                                                 |                                                                                                                                                                                                                                                                                                                                                                                                                                                                   |                                                                                                                                                                                                                                                                                                                                                                                                                                                              |
|--------------------------------------------------------------------------------------------------------------------------------------------------------------------------------------------------------------------------------------------------------------------------------------------------|----------------------------------------------------------------------------------------------------------------------------------------------------------------------------------------------------------------------------------------------------------------------------------------------------|-----------------------------------------------------------------------------------------------------------------------------------------------------------------------------------------------------------------------------------------------------------------------------------------------------------------------------------------------------------------------------------------------------------------------------------------------------------------|-------------------------------------------------------------------------------------------------------------------------------------------------------------------------------------------------------------------------------------------------------------------------------------------------------------------------------------------------------------------------------------------------------------------------------------------------------------------|--------------------------------------------------------------------------------------------------------------------------------------------------------------------------------------------------------------------------------------------------------------------------------------------------------------------------------------------------------------------------------------------------------------------------------------------------------------|
| <p>21 of 5948<br/>Similarity: 19%<br/>Overall Call: (-Ve)</p> 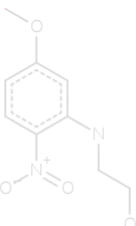 <p>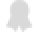 The training set compound has fired 0 Derek alert(s).</p>    | <p>22 of 5948<br/>Similarity: 19%<br/>Overall Call: (+Ve)</p> 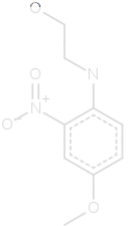 <p>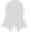 The training set compound has fired 0 Derek alert(s).</p>     | <p>23 of 5948<br/>Similarity: 19%<br/>Overall Call: (+Ve)</p> 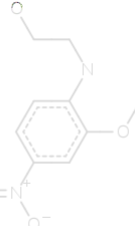 <p>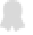 The training set compound has fired 1 Derek alert(s).</p> <p>0 alert(s) for toxicophores related to this hypothesis</p> <p>1 alert(s) for toxicophores not related to this hypothesis<br/>329: Aromatic nitro compound</p> | <p>24 of 5948<br/>Similarity: 19%<br/>Overall Call: (-Ve)</p> 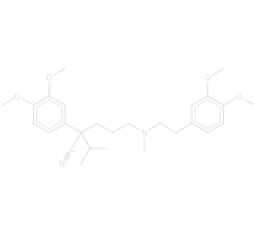 <p>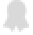 The training set compound has fired 0 Derek alert(s).</p>                                                                                                                                                                   | <p>25 of 5948<br/>Similarity: 19%<br/>Overall Call: (+Ve)</p> 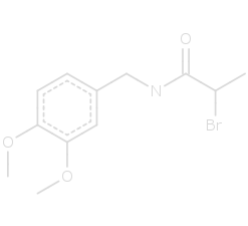 <p>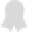 The training set compound has fired 1 Derek alert(s).</p> <p>0 alert(s) for toxicophores related to this hypothesis</p> <p>1 alert(s) for toxicophores not related to this hypothesis<br/>027: Alkylating agent</p> |
| <p>26 of 5948<br/>Similarity: 19%<br/>Overall Call: (-Ve)</p> 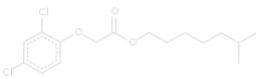 <p>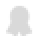 The training set compound has fired 0 Derek alert(s).</p>  | <p>27 of 5948<br/>Similarity: 19%<br/>Overall Call: (-Ve)</p> 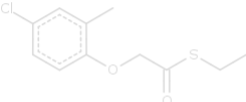 <p> The training set compound has fired 0 Derek alert(s).</p>  | <p>28 of 5948<br/>Similarity: 19%<br/>Overall Call: (-Ve)</p> 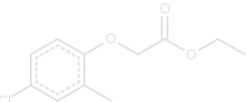 <p>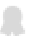 The training set compound has fired 0 Derek alert(s).</p>                                                                                                                                                               | <p>29 of 5948<br/>Similarity: 19%<br/>Overall Call: (-Ve)</p> 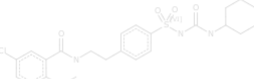 <p> The training set compound has fired 0 Derek alert(s).</p>                                                                                                                                                                | <p>30 of 5948<br/>Similarity: 19%<br/>Overall Call: (-Ve)</p> 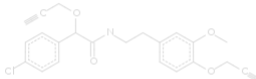 <p>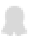 The training set compound has fired 0 Derek alert(s).</p>                                                                                                                                                        |
| <p>31 of 5948<br/>Similarity: 18%<br/>Overall Call: (-Ve)</p> 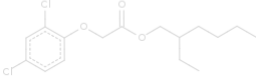 <p>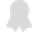 The training set compound has fired 0 Derek alert(s).</p> | <p>32 of 5948<br/>Similarity: 18%<br/>Overall Call: (-Ve)</p> 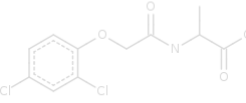 <p>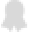 The training set compound has fired 0 Derek alert(s).</p> | <p>33 of 5948<br/>Similarity: 18%<br/>Overall Call: (+Ve)</p> 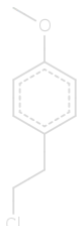 <p>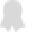 The training set compound has fired 1 Derek alert(s).</p> <p>0 alert(s) for toxicophores related to this hypothesis</p> <p>1 alert(s) for toxicophores not related to this hypothesis<br/>027: Alkylating agent</p>    | <p>34 of 5948<br/>Similarity: 18%<br/>Overall Call: (+Ve)</p> 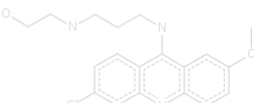 <p>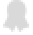 The training set compound has fired 1 Derek alert(s).</p> <p>0 alert(s) for toxicophores related to this hypothesis</p> <p>1 alert(s) for toxicophores not related to this hypothesis<br/>365: Acridine or analogue</p> | <p>35 of 5948<br/>Similarity: 18%<br/>Overall Call: (-Ve)</p> 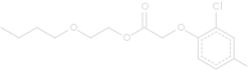 <p>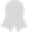 The training set compound has fired 0 Derek alert(s).</p>                                                                                                                                                       |



## Hypothesis: H-190

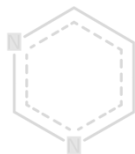

**Sarah Result:** Negative

**Confidence:** 21%

**Examples:** 403

Hypothesis

### Examples:

|                                                                                                                           |                                                                                                                                                                                                                                                                                            |                                                                                                                           |                                                                                                                                                                                                                                                                                                     |                                                                                                                                                                                                                                                                                      |
|---------------------------------------------------------------------------------------------------------------------------|--------------------------------------------------------------------------------------------------------------------------------------------------------------------------------------------------------------------------------------------------------------------------------------------|---------------------------------------------------------------------------------------------------------------------------|-----------------------------------------------------------------------------------------------------------------------------------------------------------------------------------------------------------------------------------------------------------------------------------------------------|--------------------------------------------------------------------------------------------------------------------------------------------------------------------------------------------------------------------------------------------------------------------------------------|
| <p>1 of 403<br/>Similarity: 66%<br/>Overall Call: (-Ve)</p> <p> The training set compound has fired 0 Derek alert(s).</p> | <p>2 of 403<br/>Similarity: 19%<br/>Overall Call: (-Ve)</p> <p> The training set compound has fired 0 Derek alert(s).</p>                                                                                                                                                                  | <p>3 of 403<br/>Similarity: 17%<br/>Overall Call: (-Ve)</p> <p> The training set compound has fired 0 Derek alert(s).</p> | <p>4 of 403<br/>Similarity: 17%<br/>Overall Call: (-Ve)</p> <p> The training set compound has fired 1 Derek alert(s).</p> <p>0 alert(s) for toxicophores related to this hypothesis</p> <p>1 alert(s) for toxicophores not related to this hypothesis<br/>870: Substituted 4-anilinoquinazoline</p> | <p>5 of 403<br/>Similarity: 17%<br/>Overall Call: (+Ve)</p> <p> The training set compound has fired 0 Derek alert(s).</p>                                                                                                                                                            |
| <p>6 of 403<br/>Similarity: 16%<br/>Overall Call: (-Ve)</p> <p> The training set compound has fired 0 Derek alert(s).</p> | <p>7 of 403<br/>Similarity: 16%<br/>Overall Call: (+Ve)</p> <p> The training set compound has fired 1 Derek alert(s).</p> <p>0 alert(s) for toxicophores related to this hypothesis</p> <p>1 alert(s) for toxicophores not related to this hypothesis<br/>329: Aromatic nitro compound</p> | <p>8 of 403<br/>Similarity: 16%<br/>Overall Call: (-Ve)</p> <p> The training set compound has fired 0 Derek alert(s).</p> | <p>9 of 403<br/>Similarity: 16%<br/>Overall Call: (+Ve)</p> <p> The training set compound has fired 0 Derek alert(s).</p>                                                                                                                                                                           | <p>10 of 403<br/>Similarity: 16%<br/>Overall Call: (-Ve)</p> <p> The training set compound has fired 1 Derek alert(s).</p> <p>0 alert(s) for toxicophores related to this hypothesis</p> <p>1 alert(s) for toxicophores not related to this hypothesis<br/>027: Alkylating agent</p> |



|                                                                                                                                                                                                                                                                                                 |                                                                                                                                                                                                                                                                                                   |                                                                                                                                                                                                                                                                                                   |                                                                                                                                                                                                                                                                                                    |                                                                                                                                                                                                                                                                                                                                                                                                                                                                             |
|-------------------------------------------------------------------------------------------------------------------------------------------------------------------------------------------------------------------------------------------------------------------------------------------------|---------------------------------------------------------------------------------------------------------------------------------------------------------------------------------------------------------------------------------------------------------------------------------------------------|---------------------------------------------------------------------------------------------------------------------------------------------------------------------------------------------------------------------------------------------------------------------------------------------------|----------------------------------------------------------------------------------------------------------------------------------------------------------------------------------------------------------------------------------------------------------------------------------------------------|-----------------------------------------------------------------------------------------------------------------------------------------------------------------------------------------------------------------------------------------------------------------------------------------------------------------------------------------------------------------------------------------------------------------------------------------------------------------------------|
| <p>26 of 403<br/>Similarity: 13%<br/>Overall Call: (-Ve)</p> 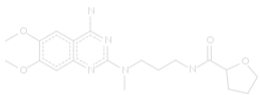 <p>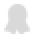 The training set compound has fired 0 Derek alert(s).</p>     | <p>27 of 403<br/>Similarity: 12%<br/>Overall Call: (-Ve)</p> 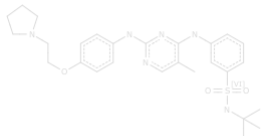 <p>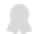 The training set compound has fired 0 Derek alert(s).</p>     | <p>28 of 403<br/>Similarity: 12%<br/>Overall Call: (-Ve)</p> 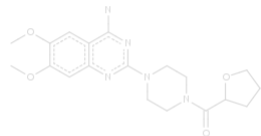 <p>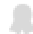 The training set compound has fired 0 Derek alert(s).</p>     | <p>29 of 403<br/>Similarity: 12%<br/>Overall Call: (-Ve)</p> 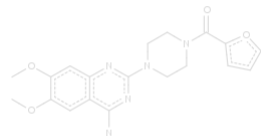 <p> The training set compound has fired 0 Derek alert(s).</p>     | <p>30 of 403<br/>Similarity: 12%<br/>Overall Call: (-Ve)</p> 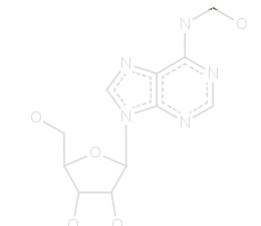 <p>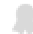 The training set compound has fired 1 Derek alert(s).</p> <p>0 alert(s) for toxicophores related to this hypothesis</p> <p>1 alert(s) for toxicophores not related to this hypothesis<br/>307: N-Methylol compound or precursor</p> |
| <p>31 of 403<br/>Similarity: 12%<br/>Overall Call: (-Ve)</p> 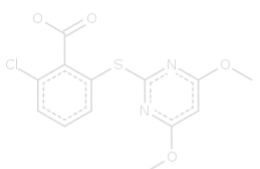 <p>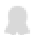 The training set compound has fired 0 Derek alert(s).</p>  | <p>32 of 403<br/>Similarity: 12%<br/>Overall Call: (-Ve)</p> 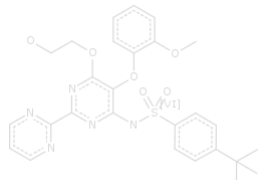 <p>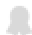 The training set compound has fired 0 Derek alert(s).</p>  | <p>33 of 403<br/>Similarity: 12%<br/>Overall Call: (-Ve)</p> 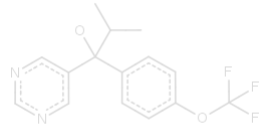 <p>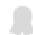 The training set compound has fired 0 Derek alert(s).</p>  | <p>34 of 403<br/>Similarity: 12%<br/>Overall Call: (-Ve)</p> 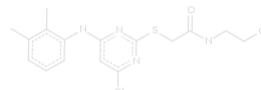 <p> The training set compound has fired 0 Derek alert(s).</p>  | <p>35 of 403<br/>Similarity: 12%<br/>Overall Call: (-Ve)</p> 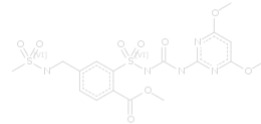 <p>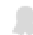 The training set compound has fired 0 Derek alert(s).</p>                                                                                                                                                                        |
| <p>36 of 403<br/>Similarity: 12%<br/>Overall Call: (-Ve)</p> 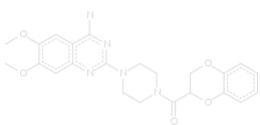 <p>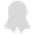 The training set compound has fired 0 Derek alert(s).</p> | <p>37 of 403<br/>Similarity: 11%<br/>Overall Call: (-Ve)</p> 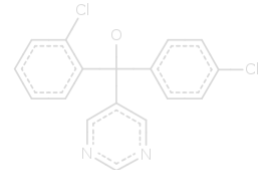 <p>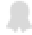 The training set compound has fired 0 Derek alert(s).</p> | <p>38 of 403<br/>Similarity: 11%<br/>Overall Call: (-Ve)</p> 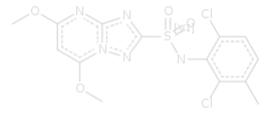 <p>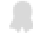 The training set compound has fired 0 Derek alert(s).</p> | <p>39 of 403<br/>Similarity: 11%<br/>Overall Call: (-Ve)</p> 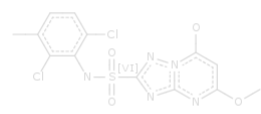 <p> The training set compound has fired 0 Derek alert(s).</p> | <p>40 of 403<br/>Similarity: 11%<br/>Overall Call: (-Ve)</p> 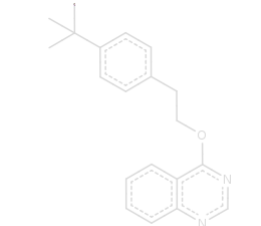 <p>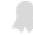 The training set compound has fired 0 Derek alert(s).</p>                                                                                                                                                                       |

|                                                                                                                                                                                                                                                                                                |                                                                                                                                                                                                                                                                                                 |                                                                                                                                                                                                                                                                                                 |                                                                                                                                                                                                                                                                                                   |                                                                                                                                                                                                                                                                                                      |
|------------------------------------------------------------------------------------------------------------------------------------------------------------------------------------------------------------------------------------------------------------------------------------------------|-------------------------------------------------------------------------------------------------------------------------------------------------------------------------------------------------------------------------------------------------------------------------------------------------|-------------------------------------------------------------------------------------------------------------------------------------------------------------------------------------------------------------------------------------------------------------------------------------------------|---------------------------------------------------------------------------------------------------------------------------------------------------------------------------------------------------------------------------------------------------------------------------------------------------|------------------------------------------------------------------------------------------------------------------------------------------------------------------------------------------------------------------------------------------------------------------------------------------------------|
| <p>41 of 403<br/>Similarity: 11%<br/>Overall Call: (-Ve)</p> 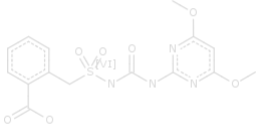 <p> The training set compound has fired 0 Derek alert(s).</p>    | <p>42 of 403<br/>Similarity: 11%<br/>Overall Call: (-Ve)</p> 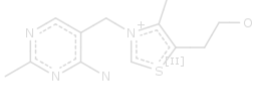 <p> The training set compound has fired 0 Derek alert(s).</p>   | <p>43 of 403<br/>Similarity: 11%<br/>Overall Call: (-Ve)</p> 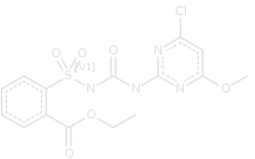 <p> The training set compound has fired 0 Derek alert(s).</p>   | <p>44 of 403<br/>Similarity: 11%<br/>Overall Call: (-Ve)</p> 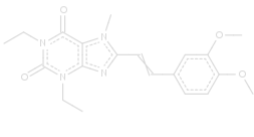 <p> The training set compound has fired 0 Derek alert(s).</p>    | <p>45 of 403<br/>Similarity: 11%<br/>Overall Call: (-Ve)</p> 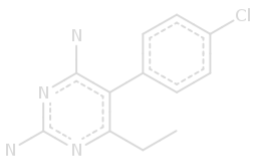 <p> The training set compound has fired 0 Derek alert(s).</p>    |
| <p>46 of 403<br/>Similarity: 11%<br/>Overall Call: (-Ve)</p> 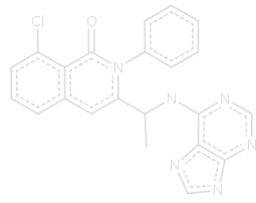 <p>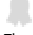 The training set compound has fired 0 Derek alert(s).</p> | <p>47 of 403<br/>Similarity: 11%<br/>Overall Call: (-Ve)</p> 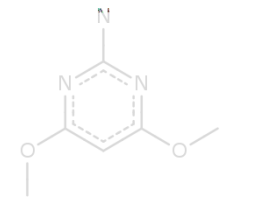 <p>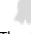 The training set compound has fired 0 Derek alert(s).</p> | <p>48 of 403<br/>Similarity: 11%<br/>Overall Call: (-Ve)</p> 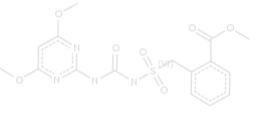 <p>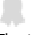 The training set compound has fired 0 Derek alert(s).</p> | <p>49 of 403<br/>Similarity: 11%<br/>Overall Call: (-Ve)</p> 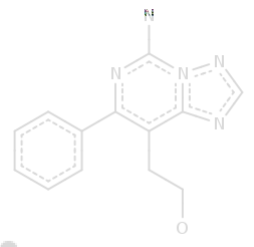 <p>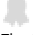 The training set compound has fired 0 Derek alert(s).</p> | <p>50 of 403<br/>Similarity: 11%<br/>Overall Call: (-Ve)</p> 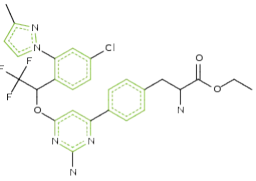 <p>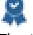 The training set compound has fired 0 Derek alert(s).</p> |
